# Supplementary material for: Phosphazene base-catalyzed telescopic three-component reaction involving 1,1-difunctionalization of electron-deficient alkenes
Source: Royal Society of Chemistry journal article supplement (doi:10.1039/d4cc05169f), 2024-11-28
Supplement: d4cc05169f1.pdf [file d4cc05169f1.pdf]

## Supplementary Information

# Phosphazene base-catalyzed telescopic three-component reaction involving 1,1-difunctionalization of electron-deficient alkenes

Azusa Kondoh,<sup>\*a</sup> Sho Yamaguchi,<sup>b</sup> and Masahiro Terada<sup>\*b</sup>

<sup>a</sup> Research and Analytical Center for Giant Molecules, Graduate School of Science, Tohoku University,  
Sendai 980-8578, Japan

<sup>b</sup> Department of Chemistry, Graduate School of Science, Tohoku University, Sendai 980-8578, Japan

### Contents

|                                                |     |
|------------------------------------------------|-----|
| General Information                            | S2  |
| Additional Experimental Results                | S3  |
| Experimental Procedure                         | S3  |
| Analytical Data                                | S5  |
| References                                     | S11 |
| <sup>1</sup> H and <sup>13</sup> C NMR Spectra | S12 |
| X-ray Structure Reports                        | S31 |

## General Information

Unless otherwise noted, the reactions were carried out with dried glassware under argon atmosphere.  $^1\text{H}$  NMR spectra were recorded on a JEOL JNM-ECA600 (600 MHz) spectrometer. Chemical shifts are reported in ppm from the solvent resonance or tetramethylsilane (TMS) as the internal standard ( $\text{CDCl}_3$ : 7.26 ppm, TMS: 0.00 ppm). Data are reported as follows: chemical shift, multiplicity (s = singlet, d = doublet, t = triplet, q = quartet, m = multiplet, br = broad), coupling constants (Hz) and integration.  $^{13}\text{C}$  NMR spectra were recorded on a JEOL JNM-ECA600 (150 MHz) spectrometer with complete proton decoupling. Chemical shifts are reported in ppm from the solvent resonance as the internal standard ( $\text{CDCl}_3$ : 77.0 ppm).  $^{31}\text{P}$  NMR spectra were recorded on a JEOL JNM-ECA600 (243 MHz) spectrometer with complete proton decoupling. Chemical shifts are reported in ppm with 85%  $\text{H}_3\text{PO}_4$  solution as an external standard (0.0 ppm in  $\text{CDCl}_3$ ).  $^{19}\text{F}$  NMR spectra were recorded on a JEOL JNM-ECA600 (565 MHz) spectrometer. Chemical shifts are reported in ppm from the  $\text{C}_6\text{F}_5\text{CF}_3$  (-67.2 ppm) resonance as the external standard. Analytical thin layer chromatography (TLC) was performed on Merck precoated TLC plates (silica gel 60 GF<sub>254</sub>, 0.25 mm). Flash column chromatography was performed on silica gel 60N (spherical, neutral, 40-50  $\mu\text{m}$ ; Kanto Chemical Co., Inc.). Gel permeation chromatography (GPC) was performed on JAI LaboACE LC-7080 Plus with JAIGEL-2HR-40. Optically rotations were measured on a Jasco P-1020 digital polarimeter with a sodium lamp and reported as follows;  $[\alpha]^{T^\circ\text{C}}_{\text{D}}$  (c = g/100 mL, solvent). HPLC was performed on JASCO HPLC systems consisting of the following: pump, PU-2080 plus; degasser, DG-2080-53; mixer, MX-2080-32; UV/Vis detector, UV2077 plus; CD detector, CD-2095; Oven, CO-2067 plus. SFC was performed on JASCO SFC systems consisting of the following: HPLC pump, PU-2080 plus;  $\text{CO}_2$  delivery pump, PU-2080- $\text{CO}_2$  plus; solvent selection unit, LV-2080-03; Back Pressure Regulators, BP-2080 and BP-2080 plus; Photodiode detector, MD-2018 plus; Oven, CO-4065. Infrared spectra were recorded on a JASCO FT/IR-4100 spectrometer. High resolution mass spectra analysis was performed on a Bruker Daltonics solariX 9.4T FT-ICR-MS spectrometer at Research and Analytical Center for Giant Molecules, Graduate School of Science, Tohoku University.

**Materials:** Unless otherwise noted, materials were purchased from Wako Pure Chemical Industries, Ltd., Tokyo Chemical Industry Co., LTD., Merck KGaA, and other commercial suppliers and were used without purification. Dichloromethane, diethyl ether, tetrahydrofuran and toluene were supplied from Kanto Chemical Co., Inc. as “Dehydrated solvent system”. Other solvents were purchased from commercial suppliers as dehydrated solvents, and used under argon atmosphere.

## Additional Experimental Results

### Preliminary Screening of Electron-deficient Alkenes

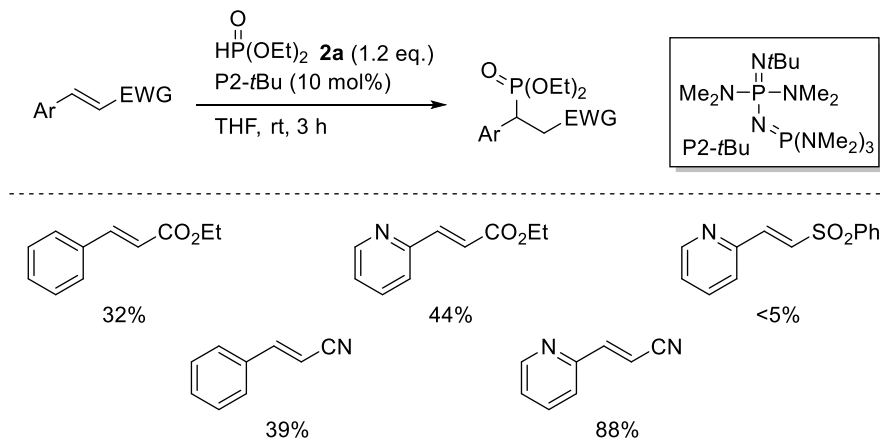

## Experimental Procedure

### Substrate Synthesis

#### General Procedure for Synthesis of Cinnamionitrile Derivative **1**

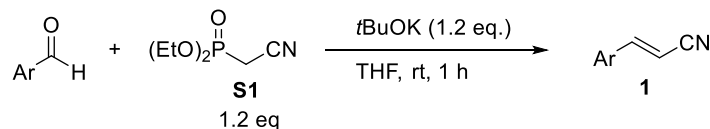

Synthesis of **1a** (Ar = 2-pyridyl, R = Ph) is representative.

To a solution of 2-pyridinecarboxaldehyde (0.48 mL, 5.0 mmol) in THF (13 mL) were sequentially added **S1** (0.93 mL, 6.0 mmol) and  $t\text{BuOK}$  (0.67 g, 6.0 mmol) at 0 °C. After stirring at room temperature for 1 h, the reaction was quenched with sat. aq.  $\text{NH}_4\text{Cl}$ . The product was extracted with AcOEt. The combined organic layer was dried over  $\text{Na}_2\text{SO}_4$ , filtrated and concentrated under reduced pressure. The crude mixture was purified by silica gel column chromatography (hexane/AcOEt = 2/1) to afford **1a** (0.44 g, 3.4 mmol, 68%) as a white solid.

#### Synthesis of **1f**

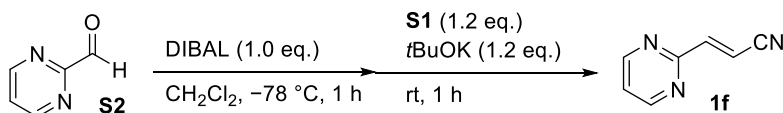

To a solution of methyl pyrimidine-2-carboxylate (**S2**, 0.41 g, 3.0 mmol) in  $\text{CH}_2\text{Cl}_2$  (40 mL) was added DIBAL (1.0 M in hexane, 3.0 mL, 3.0 mmol) at -78 °C. After stirred at -78 °C for 1 h, **S2** (0.56 mL, 3.6 mmol) and  $t\text{BuOK}$  (0.41 g, 3.6 mmol) were added to the solution. The resulting mixture was then warmed to room temperature and stirred at that temperature for 1 h. The reaction was quenched with sat. aq.  $\text{NH}_4\text{Cl}$ , and the product was extracted with  $\text{CH}_2\text{Cl}_2$ . The combined organic layer was washed with brine, dried over  $\text{Na}_2\text{SO}_4$ , filtrated and concentrated under reduced

pressure. The residue was purified by silica gel column chromatography (hexane/AcOEt = 2/1) to afford **1f** (50 mg, 0.39 mmol, 13%) as a white solid.

### General Procedure for Telescopic Three Component Reaction of Diethyl phosphite, Cinnamitrile Derivatives, and *N*-Boc Imine

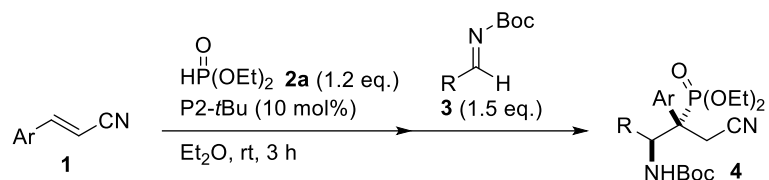

The reaction of **1a** (Ar = 2-pyridyl), **2a**, and **3a** (R = Ph) is representative (Table 1, entry 12).

To a solution of diethyl phosphite (**2a**, 17 mg, 0.12 mmol) and **1a** (13 mg, 0.10 mmol) in  $\text{Et}_2\text{O}$  (1.0 mL) was added a solution of *P*2-*t*Bu (2.0 M in THF, 5.0  $\mu\text{L}$ , 0.010 mmol) at room temperature. The reaction mixture was stirred at room temperature for 3 h. **3a** (31 mg, 0.15 mmol) was then added, and the resulting mixture was further stirred at room temperature for 3 h. The reaction was quenched with sat. aq.  $\text{NH}_4\text{Cl}$ , and the product was extracted with AcOEt. The combined organic layer was dried over  $\text{Na}_2\text{SO}_4$ , filtrated and concentrated under reduced pressure. The residue was purified by silica gel column chromatography (hexane/AcOEt = 1/1). Further purification was carried out by using preparative HPLC, and **4aa** (33 mg, 0.070 mmol, 70%) was isolated as a white solid.

## Analytical Data

<sup>1</sup>H NMR data of **1a**,<sup>S1</sup> **1d**,<sup>S1</sup> **1e**,<sup>S1</sup> **1f**,<sup>S2</sup> **1h**,<sup>S3</sup> **1i**<sup>S1</sup> and **1j**<sup>S1</sup> were identical with those reported in literature.

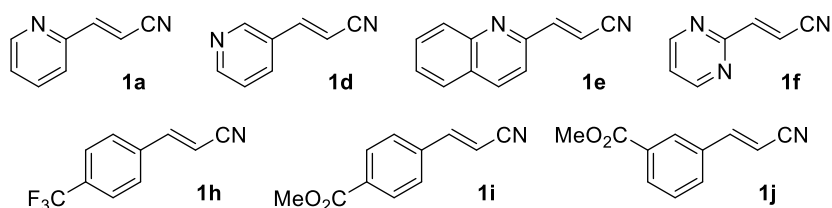

### (*E*)-3-(5-Chloropyridin-2-yl)acrylonitrile (**1b**):

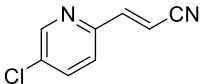

White solid; <sup>1</sup>H NMR (600 MHz, CDCl<sub>3</sub>) δ 6.57 (d, *J* = 16.2 Hz, 1H), 7.29 (d, *J* = 8.4 Hz, 1H), 7.37 (d, *J* = 16.2 Hz, 1H), 7.73 (dd, *J* = 8.4, 2.4 Hz, 1H), 8.57 (d, *J* = 1.8 Hz, 1H); <sup>13</sup>C NMR (150 MHz, CDCl<sub>3</sub>) δ 101.3, 117.6, 124.7, 133.5, 136.5, 147.1, 149.1, 149.3; IR (ATR): 3055, 2213, 1554, 1461, 1369, 1269, 1105, 1012, 957, 857, 816, 737 cm<sup>-1</sup>; HRMS (ESI) Calcd for C<sub>8</sub>H<sub>5</sub>ClN<sub>2</sub> [M+Na]<sup>+</sup> 187.0033, Found 187.0033; Mp. 100.0-102.0 °C.

### (*E*)-3-(6-Bromopyridin-2-yl)acrylonitrile (**1c**):

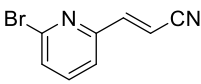

White solid; <sup>1</sup>H NMR (600 MHz, CDCl<sub>3</sub>) δ 6.62 (d, *J* = 16.2 Hz, 1H), 7.29 (d, *J* = 7.2 Hz, 1H), 7.31 (d, *J* = 16.2 Hz, 1H), 7.51 (d, *J* = 7.8 Hz, 1H), 7.61 (dd, *J* = 7.8, 7.2 Hz, 1H); <sup>13</sup>C NMR (150 MHz, CDCl<sub>3</sub>) δ 102.3, 117.4, 123.1, 129.6, 139.2, 142.8, 146.6, 152.0; IR (ATR): 3020, 2217, 1626, 1544, 1406, 1266, 1122, 960, 898, 747, 682 cm<sup>-1</sup>; HRMS (ESI) Calcd for C<sub>8</sub>H<sub>5</sub>BrN<sub>2</sub> [M+Na]<sup>+</sup> 230.9528, Found 230.9528; Mp. 130.0-132.0 °C.

### (*3R*\*,*4S*\*)-4-(*tert*-Butoxycarbonylamino)-3-diethoxyphosphoryl-4-phenyl-3-(pyridin-2-yl)butylnitrile (**4aa**):

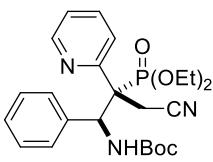

White solid; <sup>1</sup>H NMR (600 MHz, CDCl<sub>3</sub>) δ 1.10-1.20 (m, 6H), 1.32 (s, 9H), 2.89 (dd, *J* = 15.0, 11.4 Hz, 1H), 3.28 (dd, *J* = 21.6, 16.2 Hz, 1H), 3.73-3.97 (m, 1H), 3.99-4.23 (m, 3H), 5.24 (dd, *J* = 18.6, 7.8 Hz, 1H), 6.76 (d, *J* = 6.6 Hz, 1H), 7.10 (brs, 2H), 7.19-7.24 (m, 3H), 7.26 (dd, *J* = 7.8, 5.4 Hz, 1H), 7.73 (dd, *J* = 7.8, 7.2, 1.8 Hz, 1H), 7.97 (d, *J* = 7.8 Hz, 1H), 8.54-8.59 (m, 1H); <sup>13</sup>C NMR (150 MHz, CDCl<sub>3</sub>) δ 15.9 (d, *J* = 7.2 Hz), 16.2 (d, *J* = 5.7 Hz), 21.5 (d, *J* = 2.9 Hz), 28.3, 53.7 (d, *J* = 139.2 Hz), 60.5, 62.5 (d, *J* = 7.2 Hz), 64.0 (d, *J* = 8.7 Hz), 79.6, 118.1 (d, *J* = 4.4 Hz), 122.9, 124.3, 127.9 (2C), 128.1, 136.0, 137.3, 148.7, 154.5, 154.9; <sup>31</sup>P NMR (243 MHz, CDCl<sub>3</sub>) δ 24.3; IR (ATR): 2976, 2935, 1716, 1585, 1507, 1366, 1241, 1166, 1019, 792, 775 cm<sup>-1</sup>; HRMS (ESI) Calcd for C<sub>24</sub>H<sub>32</sub>N<sub>3</sub>O<sub>5</sub>P [M+Na]<sup>+</sup> 496.1972, Found 496.1972; Mp. 133.0-135.0 °C.

ORTEP drawing of (3*R*\*,4*S*\*)-4aa showing thermal ellipsoids at the 50% probability level. CCDC No. 2374658. Recrystallization from hexane/toluene.

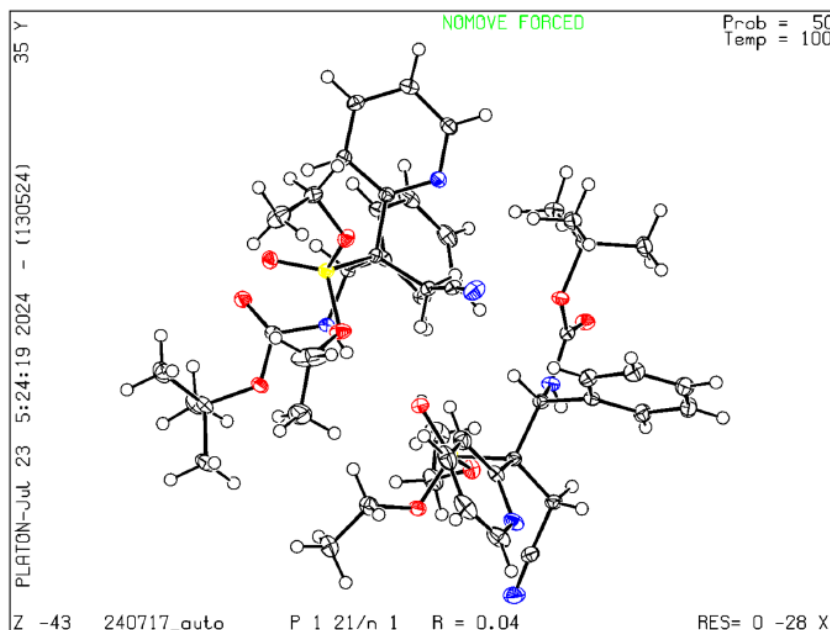

**4-(*tert*-Butoxycarbonylamino)-3-(5-chloropyridin-2-yl)-3-diethoxyphosphoryl-4-phenylbutylonitrile (4ba):**

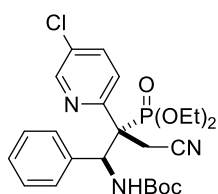

83:17 Diastereomer mixture; White solid; <sup>1</sup>H NMR (600 MHz, CDCl<sub>3</sub>) *major diastereomer*  $\delta$  1.14 (t,  $J = 7.2$  Hz, 3H), 1.19 (t,  $J = 7.2$  Hz, 3H), 1.32 (s, 9H), 2.89 (dd,  $J = 15.0, 10.2$  Hz, 1H), 3.28 (dd,  $J = 22.8, 16.8$  Hz, 1H), 3.90-4.23 (m, 4H), 5.15 (dd,  $J = 20.4, 8.4$  Hz, 1H), 6.70 (d,  $J = 7.2$  Hz, 1H), 7.13 (d,  $J = 3.0$  Hz, 2H), 7.23-7.26 (m, 3H), 7.71 (dd,  $J = 8.4, 2.4$  Hz, 1H), 7.93 (d,  $J = 8.4$  Hz, 1H), 8.53 (d,  $J = 2.4$  Hz, 1H); *minor diastereomer*  $\delta$  1.04 (t,  $J = 7.2$  Hz, 3H), 1.10 (t,  $J = 7.2$  Hz, 3H), 1.30 (s, 9H), 3.08 (dd,  $J = 15.0, 13.2$  Hz, 1H), 3.20-3.30 (m, 1H), 3.42-3.53 (m, 1H), 3.80-4.20 (m, 3H), 5.86 (brs, 1H), 6.28 (brs, 1H), 7.20-7.30 (m, 5H), 7.69 (dd,  $J = 8.4, 2.4$  Hz, 1H), 7.80 (brs, 1H), 8.64 (d,  $J = 3.0$  Hz, 1H); <sup>13</sup>C NMR (150 MHz, CDCl<sub>3</sub>) *major diastereomer*  $\delta$  15.9 (d,  $J = 7.2$  Hz), 16.2 (d,  $J = 5.9$  Hz), 21.7, 28.3, 53.4 (d,  $J = 142.2$  Hz), 60.5, 62.7 (d,  $J = 5.7$  Hz), 64.0 (d,  $J = 7.2$  Hz), 79.8, 117.7 (d,  $J = 4.4$  Hz), 125.2, 128.0, 128.06, 128.13, 131.6, 135.7, 137.0, 147.6, 153.2, 154.4; *minor diastereomer*  $\delta$  15.9 (d,  $J = 5.9$  Hz), 16.1 (d,  $J = 5.9$  Hz), 20.5, 28.2, 53.4 (d,  $J = 142.2$  Hz), 58.2, 62.9 (d,  $J = 7.2$  Hz), 63.5 (d,  $J = 7.2$  Hz), 79.8, 117.7 (d,  $J = 4.4$  Hz), 125.2, 128.1, 128.2, 128.4, 131.7, 136.1, 137.9, 147.5, 152.4 (d,  $J = 4.5$  Hz), 154.7; <sup>31</sup>P NMR (243 MHz, CDCl<sub>3</sub>) *major diastereomer*  $\delta$  23.9; *minor diastereomer*  $\delta$  23.1; IR (ATR): 2976, 2935, 1716, 1503, 1461, 1369, 1248, 1137, 1162, 1012, 967, 778, 706 cm<sup>-1</sup>; HRMS (ESI) Calcd for C<sub>24</sub>H<sub>31</sub>ClN<sub>3</sub>O<sub>5</sub>P [M+Na]<sup>+</sup> 530.1581, Found 530.1581; Mp. 72.0-74.0 °C.

**(3*R*\*,4*S*\*)-3-(6-Bromopyridin-2-yl)-4-(*tert*-butoxycarbonylamino)-3-diethoxyphosphoryl-4-phenylbutylonitrile (4ca):**

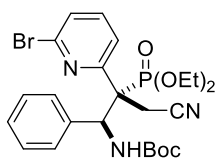

Major diastereomer; White solid; <sup>1</sup>H NMR (600 MHz, CDCl<sub>3</sub>)  $\delta$  1.14 (t,  $J = 7.2$  Hz, 3H), 1.19 (t,  $J = 7.2$  Hz, 3H), 1.33 (s, 9H), 2.88 (dd,  $J = 16.2, 10.8$  Hz, 1H), 3.20 (dd,  $J = 21.6, 16.8$  Hz, 1H), 3.91-4.00 (m, 1H), 4.01-4.13 (m, 2H), 4.14-4.25 (m, 1H), 5.21 (dd,  $J = 20.4, 8.4$  Hz, 1H),

6.78 (d,  $J = 7.8$  Hz, 1H), 7.14-7.20 (m, 2H), 7.24-7.26 (m, 3H), 7.46 (d,  $J = 7.8$  Hz, 1H), 7.59 (t,  $J = 7.8$  Hz, 1H), 7.88 (d,  $J = 7.2$  Hz, 1H);  $^{13}\text{C}$  NMR (150 MHz,  $\text{CDCl}_3$ )  $\delta$  15.9 (d,  $J = 7.2$  Hz), 16.2 (d,  $J = 4.4$  Hz), 21.7 (d,  $J = 4.4$  Hz), 28.3, 53.5 (d,  $J = 140.7$  Hz), 60.4, 62.7 (d,  $J = 7.2$  Hz), 64.2 (d,  $J = 5.7$  Hz), 79.7, 117.4 (d,  $J = 4.2$  Hz), 123.0, 127.5, 128.0, 128.1, 128.2, 137.0, 138.4, 140.8, 154.5, 156.5;  $^{31}\text{P}$  NMR (243 MHz,  $\text{CDCl}_3$ )  $\delta$  23.5; IR (ATR): 2987, 2928, 1716, 1575, 1499, 1437, 1362, 1252, 1159, 1019, 778  $\text{cm}^{-1}$ ; HRMS (ESI) Calcd for  $\text{C}_{24}\text{H}_{31}\text{BrN}_3\text{O}_5\text{P}$   $[\text{M}+\text{Na}]^+$  574.1076, Found 574.1076; Mp. 77.0-79.0  $^\circ\text{C}$ .

**(3S\*,4S\*)-4-(tert-Butoxycarbonylamino)-3-diethoxyphosphoryl-4-phenyl-3-(pyridin-3-yl)butylonitrile (4da):**

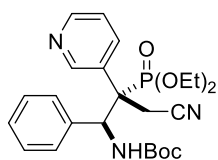

White solid;  $^1\text{H}$  NMR (600 MHz,  $\text{CDCl}_3$ )  $\delta$  1.19 (t,  $J = 7.2$  Hz, 6H), 1.33 (s, 9H), 2.92-3.12 (m, 2H), 3.87-3.99 (m, 1H), 4.03-4.21 (m, 3H), 5.15 (dd,  $J = 16.8, 8.4$  Hz, 1H), 6.59 (brs, 1H), 7.03 (brs, 2H), 7.21-7.26 (m, 3H), 7.33 (dd,  $J = 7.8, 4.8$  Hz, 1H), 7.90 (d,  $J = 7.2$  Hz, 1H), 8.61 (d,  $J = 4.2$  Hz, 1H), 8.69 (s, 1H);  $^{13}\text{C}$  NMR (150 MHz,  $\text{CDCl}_3$ )  $\delta$  15.9 (d,  $J = 5.7$  Hz), 16.2 (d,  $J = 5.7$  Hz), 20.9, 28.2, 49.4 (d,  $J = 137.9$  Hz), 61.1, 62.9 (d,  $J = 5.7$  Hz), 64.4 (d,  $J = 8.7$  Hz), 80.1, 116.5 (d,  $J = 4.4$  Hz), 123.1, 128.07, 128.14, 128.2, 131.7 (d,  $J = 4.4$  Hz), 135.4, 136.5, 149.2, 149.3 (d,  $J = 4.4$  Hz), 154.5;  $^{31}\text{P}$  NMR (243 MHz,  $\text{CDCl}_3$ )  $\delta$  24.1; IR (ATR): 2983, 2941, 1716, 1507, 1245, 1217, 1159, 1050, 1015, 973, 775  $\text{cm}^{-1}$ ; HRMS (ESI) Calcd for  $\text{C}_{24}\text{H}_{32}\text{N}_3\text{O}_5\text{P}$   $[\text{M}+\text{Na}]^+$  496.1971, Found 496.1971; Mp. 155.0-157.0  $^\circ\text{C}$ .

**4-(tert-Butoxycarbonylamino)-3-diethoxyphosphoryl-4-phenyl-3-(quinolin-2-yl)butylonitrile (4ea):**

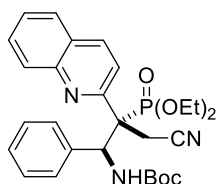

90:10 Diastereomer mixture; Yellow solid;  $^1\text{H}$  NMR (600 MHz,  $\text{CDCl}_3$ ) *major diastereomer*  $\delta$  1.12 (t,  $J = 7.2$  Hz, 3H), 1.17 (t,  $J = 7.2$  Hz, 3H), 1.29 (s, 9H), 2.99 (dd,  $J = 15.6, 12.0$  Hz, 1H), 3.40 (dd,  $J = 21.6, 16.2$  Hz, 1H), 3.84-3.92 (m, 1H), 4.04-4.24 (m, 3H), 5.42 (dd,  $J = 17.4, 9.0$  Hz, 1H), 6.83 (d,  $J = 7.8$  Hz, 1H), 7.09 (d,  $J = 7.2$  Hz, 2H), 7.13-7.20 (m, 3H), 7.57 (dd,  $J = 7.2$  Hz, 1H), 7.71 (ddd,  $J = 7.8, 7.2, 1.2$  Hz, 1H), 7.84 (d,  $J = 7.8$  Hz, 1H), 8.04 (d,  $J = 8.4$  Hz, 1H), 8.12 (d,  $J = 9.0$  Hz, 1H), 8.20 (d,  $J = 9.0$  Hz, 1H);  $^{13}\text{C}$  NMR (150 MHz,  $\text{CDCl}_3$ ) *major diastereomer*  $\delta$  15.9 (d,  $J = 5.7$  Hz), 16.2 (d,  $J = 5.9$  Hz), 21.5, 28.2, 54.4 (d,  $J = 137.9$  Hz), 60.1, 62.6 (d,  $J = 7.2$  Hz), 63.9 (d,  $J = 7.2$  Hz), 79.6, 118.3 (d,  $J = 4.4$  Hz), 121.4, 127.0, 127.1, 127.2, 127.87, 127.92, 128.0, 129.66, 129.72, 136.0, 137.3, 146.9, 154.5, 154.9;  $^{31}\text{P}$  NMR (243 MHz,  $\text{CDCl}_3$ ) *major diastereomer*  $\delta$  24.5; *minor diastereomer*  $\delta$  23.3; IR (ATR): 3343, 2980, 2945, 1688, 1520, 1252, 1166, 1022, 960, 833, 775, 702  $\text{cm}^{-1}$ ; HRMS (ESI) Calcd for  $\text{C}_{28}\text{H}_{34}\text{N}_3\text{O}_5\text{P}$   $[\text{M}+\text{Na}]^+$  546.2128, Found 546.2128; Mp. 182.0-184.0  $^\circ\text{C}$ .

**(3R\*,4S\*)-4-(tert-Butoxycarbonylamino)-3-diethoxyphosphoryl-4-phenyl-3-(pyrimidin-2-yl)butylonitrile (4fa):**

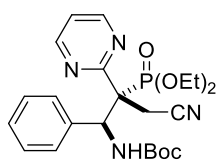

White solid;  $^1\text{H}$  NMR (600 MHz,  $\text{CDCl}_3$ )  $\delta$  1.06 (t,  $J = 7.2$  Hz, 3H), 1.26 (t,  $J = 7.2$  Hz, 3H), 1.26 (s, 9H), 2.85 (dd,  $J = 15.6, 9.0$  Hz, 1H), 3.43 (dd,  $J = 22.8, 16.2$  Hz, 1H), 3.95-4.09 (m, 2H), 4.12-4.19 (m, 1H), 4.40-4.46 (m, 1H), 5.32 (dd,  $J = 23.4, 9.6$  Hz, 1H), 6.85 (d,  $J = 6.6$  Hz, 1H), 7.19-7.29 (m, 6H), 8.80 (d,  $J = 4.8$  Hz, 2H);  $^{13}\text{C}$  NMR (150 MHz,  $\text{CDCl}_3$ )  $\delta$  15.7 (d,  $J = 7.2$  Hz), 16.4 (d,  $J = 4.4$  Hz), 22.7, 28.2, 56.1 (d,  $J = 143.6$  Hz), 61.1, 61.9 (d,  $J = 4.4$  Hz), 64.6 (d,  $J = 7.2$  Hz), 79.4, 117.6 (d,  $J = 2.9$  Hz), 119.9, 128.0 (2C), 128.3, 137.4 (d,  $J = 2.8$  Hz), 154.5, 156.8, 166.3;  $^{31}\text{P}$  NMR (243 MHz,  $\text{CDCl}_3$ )  $\delta$  22.8; IR (ATR): 2983, 2941, 1709, 1564, 1507, 1410, 1245, 1162, 1060, 1022, 967, 709  $\text{cm}^{-1}$ ; HRMS (ESI) Calcd for  $\text{C}_{23}\text{H}_{31}\text{N}_4\text{O}_5\text{P}$   $[\text{M}+\text{Na}]^+$  497.1924, Found 497.1924; Mp. 198.0-200.0  $^\circ\text{C}$ .

#### 4-(*tert*-Butoxycarbonylamino)-3-diethoxyphosphoryl-4-phenyl-3-(4-trifluoromethyl)phenylbutylonitrile

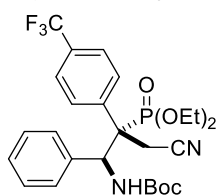

##### (4ha):

88:12 Diastereomer mixture; White solid; <sup>1</sup>H NMR (600 MHz, CDCl<sub>3</sub>) *major diastereomer*  $\delta$  1.10-1.23 (m, 6H), 1.31 (s, 9H), 2.89-3.06 (m, 2H), 3.82-3.93 (m, 1H), 4.00-4.21 (m, 3H), 5.17 (dd,  $J = 17.4, 9.0$  Hz, 1H), 6.53 (brs, 1H), 7.01 (brs, 2H), 7.16-7.25 (m, 3H), 7.65 (d,  $J = 8.4$  Hz, 2H), 7.75 (d,  $J = 8.4$  Hz, 2H); <sup>13</sup>C NMR (150 MHz, CDCl<sub>3</sub>) *major diastereomer*  $\delta$  15.9 (d,  $J = 5.7$  Hz), 16.2 (d,  $J = 5.9$  Hz), 21.3, 28.2, 51.0 (d,  $J = 137.7$  Hz), 61.2, 62.9 (d,  $J = 7.2$  Hz), 64.4 (d,  $J = 7.1$  Hz), 80.0, 116.7 (d,  $J = 4.4$  Hz), 123.8 (q,  $J = 270.0$  Hz), 125.3 (q,  $J = 3.0$  Hz), 128.0, 128.1, 128.2, 128.6 (d,  $J = 5.7$  Hz), 130.3 (q,  $J = 33.0$  Hz), 136.6, 139.7, 154.5; <sup>19</sup>F NMR (565 MHz, CDCl<sub>3</sub>) *major diastereomer*  $\delta$  -62.65; *minor diastereomer*  $\delta$  -62.67; <sup>31</sup>P NMR (243 MHz, CDCl<sub>3</sub>) *major diastereomer*  $\delta$  24.1; *minor diastereomer*  $\delta$  23.1; IR (ATR): 2979, 2928, 1717, 1691, 1500, 1330, 1243, 1166, 1122, 1015, 767, 708 cm<sup>-1</sup>; HRMS (ESI) Calcd for C<sub>26</sub>H<sub>32</sub>F<sub>3</sub>N<sub>2</sub>O<sub>5</sub>P [M+Na]<sup>+</sup> 563.1893, Found 563.1893; Mp. 207.0-209.0 °C.

#### 4-(*tert*-Butoxycarbonylamino)-3-diethoxyphosphoryl-3-(4-methoxycarbonyl)phenyl-4-phenylbutylonitrile

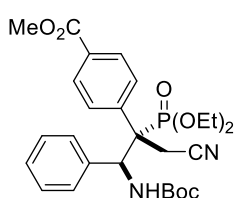

##### (4ia):

88:12 Diastereomer mixture; White solid; <sup>1</sup>H NMR (600 MHz, CDCl<sub>3</sub>) *major diastereomer*  $\delta$  1.15 (t,  $J = 7.2$  Hz, 3H), 1.22 (t,  $J = 7.2$  Hz, 3H), 1.34 (s, 9H), 2.87-3.03 (m, 2H), 3.77-3.87 (m, 1H), 3.94 (s, 3H), 4.06-4.20 (m, 3H), 5.29 (dd,  $J = 13.8, 7.8$  Hz, 1H), 6.49 (brs, 1H), 6.93 (brs, 2H), 7.16 (dd,  $J = 7.2, 6.6$  Hz, 2H), 7.21 (t,  $J = 7.2$  Hz, 1H), 7.68 (d,  $J = 7.2$  Hz, 2H), 8.05 (d,  $J = 8.4$  Hz, 2H); <sup>13</sup>C NMR (150 MHz, CDCl<sub>3</sub>) *major diastereomer*  $\delta$  16.0 (d,  $J = 5.7$  Hz), 16.2 (d,  $J = 5.7$  Hz), 20.8, 28.2, 51.0 (d,  $J = 137.9$  Hz), 52.3, 60.9, 62.9 (d,  $J = 5.7$  Hz), 64.4 (d,  $J = 7.2$  Hz), 80.0, 116.9 (d,  $J = 2.9$  Hz), 127.9, 127.96, 128.03, 128.2 (d,  $J = 5.7$  Hz), 129.6, 129.8, 136.6, 140.6 (d,  $J = 2.9$  Hz), 154.5, 166.4; <sup>31</sup>P NMR (243 MHz, CDCl<sub>3</sub>) *major diastereomer*  $\delta$  24.2; *minor diastereomer*  $\delta$  23.2; IR (ATR): 2992, 2941, 1726, 1702, 1507, 1307, 1366, 1248, 1166, 1046, 1012, 964, 826, 770, 702, 651 cm<sup>-1</sup>; HRMS (ESI) Calcd for C<sub>27</sub>H<sub>35</sub>N<sub>2</sub>O<sub>7</sub>P [M+Na]<sup>+</sup> 553.2073, Found 553.2073; Mp. 188.0-190.0 °C.

#### 4-(*tert*-Butoxycarbonylamino)-3-diethoxyphosphoryl-3-(3-methoxycarbonyl)phenyl-4-phenylbutylonitrile

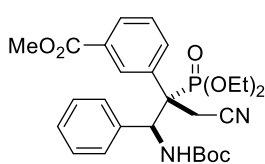

##### (4ja):

80:20 Diastereomer mixture; White solid; <sup>1</sup>H NMR (600 MHz, CDCl<sub>3</sub>) *major diastereomer*  $\delta$  1.17 (t,  $J = 7.2$  Hz, 3H), 1.21 (t,  $J = 7.2$  Hz, 3H), 1.33 (s, 9H), 2.89-3.03 (m, 2H), 3.80-3.91 (m, 1H), 3.94 (s, 3H), 4.05-4.21 (m, 3H), 5.24 (dd,  $J = 15.6, 7.8$  Hz, 1H), 6.62 (brs, 1H), 6.97 (d,  $J = 5.4$  Hz, 2H), 7.18 (t,  $J = 7.2$  Hz, 2H), 7.21 (t,  $J = 7.2$  Hz, 1H), 7.48 (t,  $J = 7.8$  Hz, 1H), 7.84 (d,  $J = 7.2$  Hz, 1H), 8.07 (dd,  $J = 8.4, 0.6$  Hz, 1H), 8.23 (s, 1H); *minor diastereomer*  $\delta$  0.92 (t,  $J = 7.2$  Hz, 3H), 1.08 (t,  $J = 7.2$  Hz, 3H), 1.27 (s, 9H), 3.10-3.25 (m, 2H), 3.67-3.70 (m, 1H), 3.80-4.20 (m, 3H), 3.94 (s, 3H), 5.74 (d,  $J = 2.4$  Hz, 1H), 5.90 (brs, 1H), 7.28-7.35 (m, 5H), 7.54 (t,  $J = 7.8$  Hz, 1H), 8.01 (d,  $J = 7.8$  Hz, 1H), 8.05 (dd,  $J = 7.8, 0.6$  Hz, 1H), 8.23 (s, 1H); <sup>13</sup>C NMR (150 MHz, CDCl<sub>3</sub>) *major diastereomer*  $\delta$  16.0 (d,  $J = 5.7$  Hz), 16.2 (d,  $J = 5.7$  Hz), 21.0, 28.2, 50.6 (d,  $J = 137.9$  Hz), 52.3, 61.1, 62.9 (d,  $J = 7.2$  Hz), 64.3 (d,  $J = 7.2$  Hz), 79.8, 116.9 (d,  $J = 4.2$  Hz), 127.96, 128.03 (2C), 128.6, 128.9 (d,  $J = 5.7$  Hz), 129.4, 130.4, 132.7 (d,  $J = 4.4$  Hz), 136.1 (d,  $J = 4.2$  Hz), 136.7 (d,  $J = 5.7$  Hz), 154.5, 166.5; *minor diastereomer*  $\delta$  15.9 (d,  $J = 5.7$  Hz), 16.0 (d,  $J = 5.7$  Hz), 20.2, 28.1, 51.3 (d,  $J = 136.8$  Hz),



52.3, 61.1, 62.5 (d,  $J = 7.0$  Hz), 64.0 (d,  $J = 7.3$  Hz), 80.0, 116.9 (d,  $J = 4.2$  Hz), 127.8-128.1 (3C), 128.6, 128.7, 129.5, 130.5, 133.6 (d,  $J = 2.7$  Hz), 134.6 (d,  $J = 4.4$  Hz), 137.9 (d,  $J = 5.7$  Hz), 154.7, 166.6;  $^{31}\text{P}$  NMR (243 MHz,  $\text{CDCl}_3$ ) *major diastereomer*  $\delta$ 24.4; *minor diastereomer*  $\delta$ 23.5; IR (ATR): 2980, 2925, 1719, 1503, 1373, 1283, 1170, 1050, 1019, 964, 744, 709  $\text{cm}^{-1}$ ; HRMS (ESI) Calcd for  $\text{C}_{27}\text{H}_{35}\text{N}_2\text{O}_7\text{P}$   $[\text{M}+\text{Na}]^+$  553.2074, Found 553.2074; Mp. 83.0-85.0  $^\circ\text{C}$ .

**(3*R*\*,4*S*\*)-4-(*tert*-Butoxycarbonylamino)-3-diethoxyphosphoryl-4-(4-methylphenyl)-3-(pyridin-2-yl)butylonitrile (4ab):**

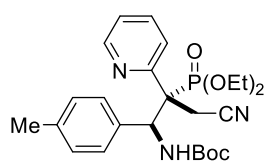

White solid;  $^1\text{H}$  NMR (600 MHz,  $\text{CDCl}_3$ )  $\delta$  1.15 (t,  $J = 7.2$  Hz, 3H), 1.18 (t,  $J = 7.2$  Hz, 3H), 1.32 (s, 9H), 2.28 (s, 3H), 2.88 (dd,  $J = 15.0, 10.8$  Hz, 1H), 3.26 (dd,  $J = 22.8, 16.8$  Hz, 1H), 3.82-3.94 (m, 1H), 4.04-4.22 (m, 3H), 5.22 (dd,  $J = 18.0, 7.8$  Hz, 1H), 6.70 (d,  $J = 7.2$  Hz, 1H), 6.94 (d,  $J = 7.8$  Hz, 2H), 7.00 (d,  $J = 7.8$  Hz, 2H), 7.25 (dd,  $J = 7.2, 4.8$  Hz, 1H), 7.73 (td,  $J = 7.8, 1.8$  Hz, 1H), 7.97 (d,  $J = 8.4$  Hz, 1H), 8.56 (d,  $J = 4.2$  Hz, 1H);  $^{13}\text{C}$  NMR (150 MHz,  $\text{CDCl}_3$ )  $\delta$  15.9 (d,  $J = 5.9$  Hz), 16.2 (d,  $J = 5.7$  Hz), 21.0, 21.3 (d,  $J = 2.9$  Hz), 28.3, 53.7 (d,  $J = 139.3$  Hz), 60.2, 62.5 (d,  $J = 7.2$  Hz), 63.9 (d,  $J = 7.2$  Hz), 79.5, 118.2 (d,  $J = 4.4$  Hz), 122.8, 124.3, 127.9, 128.6, 134.2, 136.0, 137.5, 148.7, 154.5, 155.0;  $^{31}\text{P}$  NMR (243 MHz,  $\text{CDCl}_3$ )  $\delta$ 24.7; IR (ATR): 2983, 2935, 2310, 1716, 1513, 1430, 1366, 1241, 1032, 967, 775  $\text{cm}^{-1}$ ; HRMS (ESI) Calcd for  $\text{C}_{25}\text{H}_{34}\text{N}_3\text{O}_5\text{P}$   $[\text{M}+\text{Na}]^+$  510.2128, Found 510.2128; Mp. 165.0-167.0  $^\circ\text{C}$ .

**(3*R*\*,4*S*\*)-4-(*tert*-Butoxycarbonylamino)-3-diethoxyphosphoryl-4-(3-methylphenyl)-3-(pyridin-2-yl)butylonitrile (4ac):**

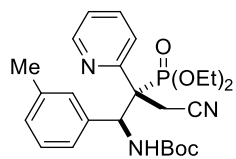

Yellow solid;  $^1\text{H}$  NMR (600 MHz,  $\text{CDCl}_3$ )  $\delta$  1.17 (t,  $J = 7.2$  Hz, 6H), 1.32 (s, 9H), 2.24 (s, 3H), 2.86 (dd,  $J = 14.4, 11.4$  Hz, 1H), 3.28 (dd,  $J = 22.8, 16.8$  Hz, 1H), 3.86-3.92 (m, 1H), 4.02-4.22 (m, 3H), 5.18 (dd,  $J = 19.2, 8.4$  Hz, 1H), 6.73 (d,  $J = 8.4$  Hz, 1H), 6.85 (s, 1H), 6.90 (d,  $J = 6.6$  Hz, 1H), 7.03 (d,  $J = 7.8$  Hz, 1H), 7.10 (dd,  $J = 7.8, 7.2$  Hz, 1H), 7.26 (dd,  $J = 7.8, 5.4$  Hz, 1H), 7.73 (ddd,  $J = 7.8, 7.2, 1.2$  Hz, 1H), 7.97 (d,  $J = 7.8$  Hz, 1H), 8.57 (d,  $J = 4.8$  Hz, 1H);  $^{13}\text{C}$  NMR (150 MHz,  $\text{CDCl}_3$ )  $\delta$  15.9 (d,  $J = 5.7$  Hz), 16.2 (d,  $J = 5.9$  Hz), 21.4, 21.5 (d,  $J = 4.4$  Hz), 28.3, 53.6 (d,  $J = 140.9$  Hz), 60.5, 62.5 (d,  $J = 7.2$  Hz), 63.9 (d,  $J = 8.7$  Hz), 79.5, 118.1 (d,  $J = 4.4$  Hz), 122.8, 124.4, 125.1, 127.8, 128.6, 128.8, 135.9, 137.1, 137.4, 148.7, 154.5, 155.0;  $^{31}\text{P}$  NMR (243 MHz,  $\text{CDCl}_3$ )  $\delta$ 24.6; IR (ATR): 2980, 2935, 1712, 1509, 1366, 1245, 1166, 1050, 1015, 970, 788  $\text{cm}^{-1}$ ; HRMS (ESI) Calcd for  $\text{C}_{25}\text{H}_{34}\text{N}_3\text{O}_5\text{P}$   $[\text{M}+\text{Na}]^+$  510.2128, Found 510.2128; Mp. 131.0-133.0  $^\circ\text{C}$ .

**(3*R*\*,4*S*\*)-4-(*tert*-Butoxycarbonylamino)-3-diethoxyphosphoryl-4-(4-methoxyphenyl)-3-(pyridin-2-yl)butylonitrile (4ad):**

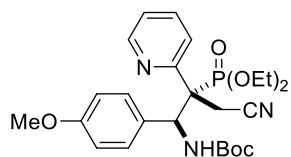

White solid;  $^1\text{H}$  NMR (600 MHz,  $\text{CDCl}_3$ )  $\delta$  1.15 (t,  $J = 7.2$  Hz, 3H), 1.20 (t,  $J = 7.2$  Hz, 3H), 1.33 (s, 9H), 2.89 (dd,  $J = 14.4, 11.4$  Hz, 1H), 3.25 (dd,  $J = 22.2, 16.8$  Hz, 1H), 3.76 (s, 3H), 3.82-3.93 (m, 1H), 4.05-4.20 (m, 3H), 5.20 (dd,  $J = 18.0, 7.8$  Hz, 1H), 6.66-6.75 (m, 1H), 6.73 (d,  $J = 8.4$  Hz, 2H), 6.99 (d,  $J = 8.4$  Hz, 2H), 7.26 (dd,  $J = 7.8, 4.8$  Hz, 1H), 7.73 (td,  $J = 7.8, 1.8$  Hz, 1H), 7.96 (d,  $J = 7.8$  Hz, 1H), 7.90 (dd,  $J = 4.2, 1.2$  Hz, 1H);  $^{13}\text{C}$  NMR (150 MHz,  $\text{CDCl}_3$ )  $\delta$  16.0 (d,  $J = 7.2$  Hz), 16.2 (d,  $J = 5.7$  Hz), 21.4 (d,  $J = 4.2$  Hz), 28.3, 53.7 (d,  $J = 139.2$  Hz), 55.2, 60.0, 62.5 (d,  $J = 7.2$  Hz), 63.9 (d,  $J = 8.7$  Hz), 79.5, 113.2, 118.2 (d,  $J = 4.2$  Hz), 122.9, 124.3, 129.2, 129.4, 136.0, 148.7, 154.5, 155.0, 159.1;  $^{31}\text{P}$  NMR (243 MHz,  $\text{CDCl}_3$ )  $\delta$ 24.7; IR (ATR): 2983, 2932, 1716, 1585, 1513, 1366, 1248, 1166, 1022, 967, 788  $\text{cm}^{-1}$ ; HRMS

(ESI) Calcd for C<sub>25</sub>H<sub>34</sub>N<sub>3</sub>O<sub>6</sub>P [M+Na]<sup>+</sup> 526.2077, Found 526.2077; Mp. 140.0-142.0 °C.

**(3*R*\*,4*S*\*)-4-(4-Bromophenyl)-4-(*tert*-butoxycarbonylamino)-3-diethoxyphosphoryl-3-(pyridin-2-yl)butylonitrile (4ae):**

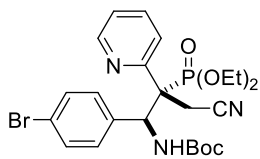

White solid; <sup>1</sup>H NMR (600 MHz, CDCl<sub>3</sub>) δ 1.17 (t, *J* = 7.2 Hz, 3H), 1.21 (t, *J* = 7.2 Hz, 3H), 1.34 (s, 9H), 2.92 (dd, *J* = 14.4, 12.0 Hz, 1H), 3.22 (dd, *J* = 21.0, 16.2 Hz, 1H), 3.82-3.95 (m, 1H), 4.05-4.20 (m, 3H), 5.26 (dd, *J* = 16.8, 8.4 Hz, 1H), 6.75 (d, *J* = 6.0 Hz, 1H), 6.93 (d, *J* = 8.4 Hz, 2H), 7.28 (dd, *J* = 7.2, 5.4 Hz, 1H), 7.33 (d, *J* = 8.4 Hz, 2H), 7.74 (td, *J* = 7.8, 1.8 Hz, 1H), 7.96 (d, *J* = 7.8 Hz, 1H), 8.57 (d, *J* = 3.6 Hz, 1H); <sup>13</sup>C NMR (150 MHz, CDCl<sub>3</sub>) δ 16.0 (d, *J* = 5.7 Hz), 16.2 (d, *J* = 5.7 Hz), 21.3, 28.3, 53.3 (d, *J* = 139.2 Hz), 59.9, 62.7 (d, *J* = 7.2 Hz), 64.1 (d, *J* = 7.2 Hz), 79.9, 117.9 (d, *J* = 4.2 Hz), 122.0, 123.1, 124.3, 129.8, 131.0, 136.2, 136.6, 148.8, 154.5, 154.6; <sup>31</sup>P NMR (243 MHz, CDCl<sub>3</sub>) δ 24.2; IR (ATR): 2980, 2941, 1716, 1599, 1507, 1245, 1159, 1028, 1008, 977, 795 cm<sup>-1</sup>; HRMS (ESI) Calcd for C<sub>24</sub>H<sub>31</sub>BrN<sub>3</sub>O<sub>5</sub>P [M+Na]<sup>+</sup> 574.1077, Found 574.1077; Mp. 183.0-185.0 °C.

**4-(*tert*-Butoxycarbonylamino)-3-diethoxyphosphoryl-4-(2-naphthyl)-3-(pyridin-2-yl)butylonitrile (4af):**

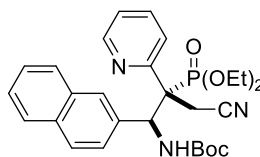

83:17 Diastereomer mixture; White solid; <sup>1</sup>H NMR (600 MHz, CDCl<sub>3</sub>) *major diastereomer* δ 1.07 (t, *J* = 7.2 Hz, 3H), 1.16 (t, *J* = 5.7 Hz, 3H), 1.33 (s, 9H), 2.93 (dd, *J* = 15.0, 11.4 Hz, 1H), 3.32 (dd, *J* = 21.6, 16.2 Hz, 1H), 3.80-3.95 (m, 1H), 4.01-4.13 (m, 2H), 4.14-4.23 (m, 1H), 5.42 (dd, *J* = 18.6, 8.4 Hz, 1H), 6.91 (d, *J* = 7.2 Hz, 1H), 7.18 (d, *J* = 7.8 Hz, 1H), 7.28 (dd, *J* = 7.2, 4.8 Hz, 1H), 7.43-7.46 (m, 2H), 7.58 (s, 1H), 7.67 (d, *J* = 8.4 Hz, 1H), 7.70-7.73 (m, 1H), 7.76-7.79 (m, 2H), 8.02 (d, *J* = 7.8 Hz, 1H), 8.56 (d, *J* = 4.8 Hz, 1H); <sup>13</sup>C NMR (150 MHz, CDCl<sub>3</sub>) *major diastereomer* δ 15.8 (d, *J* = 5.7 Hz), 16.2 (d, *J* = 5.9 Hz), 21.6 (d, *J* = 4.2 Hz), 28.3, 53.7 (d, *J* = 139.4 Hz), 60.7, 62.6 (d, *J* = 7.2 Hz), 64.0 (d, *J* = 7.2 Hz), 79.7, 118.0 (d, *J* = 4.4 Hz), 122.9, 124.3, 125.8, 126.1 (2C), 127.4 (2C), 127.5, 128.0, 132.7, 132.8, 134.8, 136.1, 148.8, 154.5, 155.0; <sup>31</sup>P NMR (243 MHz, CDCl<sub>3</sub>) *major diastereomer* δ 24.6; *minor diastereomer* δ 23.6; IR (ATR): 2976, 1712, 1589, 1507, 1369, 1241, 1162, 1015, 970, 861, 823, 747 cm<sup>-1</sup>; HRMS (ESI) Calcd for C<sub>28</sub>H<sub>34</sub>N<sub>3</sub>O<sub>5</sub>P [M+Na]<sup>+</sup> 546.2128, Found 546.2128; Mp. 185.0-187.0 °C.

**(3*R*\*,4*S*\*)-4-(*tert*-Butoxycarbonylamino)-3-diethoxyphosphoryl-4-(2-furyl)-3-(pyridin-2-yl)butylonitrile (4ag):**

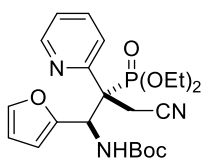

Brown solid; <sup>1</sup>H NMR (600 MHz, CDCl<sub>3</sub>) δ 1.14 (t, *J* = 7.2 Hz, 3H), 1.21 (t, *J* = 7.2 Hz, 3H), 1.32 (s, 9H), 3.21 (dd, *J* = 16.8, 10.2 Hz, 1H), 3.45 (dd, *J* = 21.0, 16.8 Hz, 1H), 3.80-3.92 (m, 1H), 3.92-3.98 (m, 1H), 4.03-4.16 (m, 2H), 5.36 (dd, *J* = 22.2, 10.2 Hz, 1H), 6.16 (d, *J* = 3.0 Hz, 1H), 6.28 (dd, *J* = 3.0, 1.8 Hz, 1H), 6.47 (d, *J* = 8.4 Hz, 1H), 7.25 (dd, *J* = 6.6, 5.4 Hz, 1H), 7.31 (dd, *J* = 1.8, 1.2 Hz, 1H), 7.70 (td, *J* = 7.8, 1.8 Hz, 1H), 7.92 (d, *J* = 7.8 Hz, 1H), 8.61 (ddd, *J* = 4.8, 1.2, 0.6 Hz, 1H); <sup>13</sup>C NMR (150 MHz, CDCl<sub>3</sub>) δ 16.0 (d, *J* = 7.2 Hz), 16.1 (d, *J* = 5.9 Hz), 21.8 (d, *J* = 4.4 Hz), 28.2, 53.6 (d, *J* = 142.2 Hz), 54.4, 62.6 (d, *J* = 7.2 Hz), 63.7 (d, *J* = 7.1 Hz), 79.8, 108.7, 110.3, 117.9 (d, *J* = 5.7 Hz), 122.9, 124.2, 136.0, 142.0, 148.7, 151.2 (d, *J* = 5.7 Hz), 154.4, 154.6; <sup>31</sup>P NMR (243 MHz, CDCl<sub>3</sub>) δ 23.9; IR (ATR): 3429, 2983, 1723, 1513, 1375, 1239, 1156, 1052, 1012, 950, 781 cm<sup>-1</sup>; HRMS (ESI) Calcd for C<sub>22</sub>H<sub>30</sub>N<sub>3</sub>O<sub>6</sub>P [M+Na]<sup>+</sup> 486.1764, Found 486.1764; Mp. 158.0-160.0 °C.

#### 4-(*tert*-Butoxycarbonylamino)-4-cyclohexyl-3-diethoxyphosphoryl-3-(pyridin-2-yl)butylonitrile (4ah):

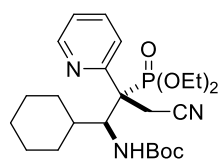

86:14 Diastereomer mixture; White solid;  $^1\text{H}$  NMR (600 MHz,  $\text{CDCl}_3$ ) *major diastereomer*  $\delta$  0.81-1.10 (m, 6H), 1.15 (t,  $J = 7.2$  Hz, 3H), 1.30-1.37 (m, 1H), 1.40 (t,  $J = 7.2$  Hz, 3H), 1.44 (s, 9H), 1.49-1.60 (m, 3H), 1.79-1.87 (m, 1H), 3.22 (dd,  $J = 16.8, 15.0$  Hz, 1H), 3.43 (dd,  $J = 19.2, 16.8$  Hz, 1H), 3.76-3.83 (m, 1H), 4.03-4.09 (m, 1H), 4.20-4.28 (m, 3H), 5.55 (d,  $J = 10.8$  Hz, 1H), 7.24 (dd,  $J = 7.8, 4.8$  Hz, 1H), 7.69 (td,  $J = 7.8, 1.8$  Hz, 1H), 8.02 (d,  $J = 7.8$  Hz, 1H), 8.59 (ddd,  $J = 4.8, 1.8, 1.2$  Hz, 1H);  $^{13}\text{C}$  NMR (150 MHz,  $\text{CDCl}_3$ ) *major diastereomer*  $\delta$  16.2 (d,  $J = 5.9$  Hz), 16.4 (d,  $J = 5.9$  Hz), 21.2 (d,  $J = 4.4$  Hz), 25.9, 26.0, 26.6, 28.2, 28.4, 33.3, 40.0 (d,  $J = 4.2$  Hz), 53.3 (d,  $J = 140.7$  Hz), 59.3, 62.9 (d,  $J = 7.2$  Hz), 63.3 (d,  $J = 7.2$  Hz), 79.3, 118.7 (d,  $J = 2.9$  Hz), 122.8, 124.2, 136.3, 148.8, 155.5, 155.7;  $^{31}\text{P}$  NMR (243 MHz,  $\text{CDCl}_3$ ) *major diastereomer*  $\delta$  25.3; *minor diastereomer*  $\delta$  25.6; IR (ATR): 2981, 1661, 1594, 1493, 1448, 1307, 1255, 1137, 1029, 1006, 968, 910, 829, 748, 690  $\text{cm}^{-1}$ ; HRMS (ESI) Calcd for  $\text{C}_{24}\text{H}_{38}\text{N}_3\text{O}_5\text{P}$   $[\text{M}+\text{Na}]^+$  502.2441, Found 502.2441; Mp. 120.0-122.0  $^\circ\text{C}$ .

#### 3-Diethoxyphosphoryl-3-(pyridin-2-yl)propionitrile (5a):

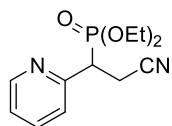

Brown oil;  $^1\text{H}$  NMR (600 MHz,  $\text{CDCl}_3$ )  $\delta$  1.25 (t,  $J = 7.2$  Hz, 3H), 7.26 (t,  $J = 7.2$  Hz, 3H), 3.06 (ddd,  $J = 16.8, 9.6, 4.2$  Hz, 1H), 3.40 (td,  $J = 16.8, 10.8$  Hz, 1H), 3.67 (ddd,  $J = 22.8, 10.8, 4.8$  Hz, 1H), 3.97-4.10 (m, 4H), 7.25 (m, 1H), 7.41 (dt,  $J = 7.8, 1.2$  Hz, 1H), 7.70 (td,  $J = 7.8, 1.8$  Hz, 1H), 8.62 (dd,  $J = 4.8, 1.2$  Hz, 1H);  $^{13}\text{C}$  NMR (150 MHz,  $\text{CDCl}_3$ )  $\delta$  16.2 (d,  $J = 7.2$  Hz), 16.3 (d,  $J = 5.7$  Hz), 17.4, 43.0 (d,  $J = 138.0$  Hz), 62.9 (d,  $J = 7.2$  Hz), 63.1 (d,  $J = 7.2$  Hz), 118.0 (d,  $J = 20.1$  Hz), 122.9 (d,  $J = 2.9$  Hz), 124.7 (d,  $J = 5.9$  Hz), 136.7, 149.6, 152.8 (d,  $J = 7.1$  Hz);  $^{31}\text{P}$  NMR (243 MHz,  $\text{CDCl}_3$ )  $\delta$  23.3; IR (ATR): 2983, 2935, 2911, 2255, 1589, 1476, 1434, 1252, 1022, 960, 850, 799, 751  $\text{cm}^{-1}$ ; HRMS (ESI) Calcd for  $\text{C}_{12}\text{H}_{17}\text{N}_2\text{O}_3\text{P}$   $[\text{M}+\text{Na}]^+$  291.0868, Found 291.0868.

## References

- S1 J. M. Pérez, R. Postolache, M. C. Reis, E. G. Sinnema, D. Vargová, F. de Vries, E. Otten, L. Ge, S. R. Harutyunyan, *J. Am. Chem. Soc.* **2021**, *143*, 20071-20076.
- S2 K. Bhansali, S. Raut, S. Barange, P. Bhagat, *New. J. Chem.* **2020**, *44*, 19690-19712.
- S3 J. B. Metternich, D. G. Artiukhin, M. C. Holland, M. von Bremen-Kühne, J. Neugebauer, R. Gilmour, *J. Org. Chem.* **2017**, *82*, 9955-9977.

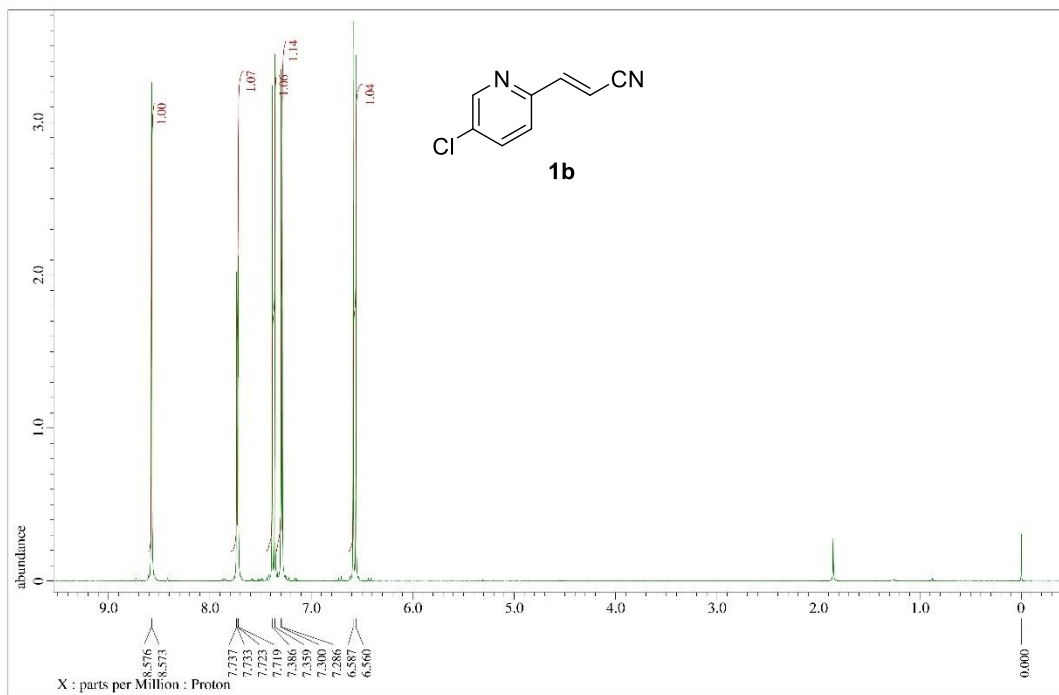

600 MHz, CDCl<sub>3</sub>

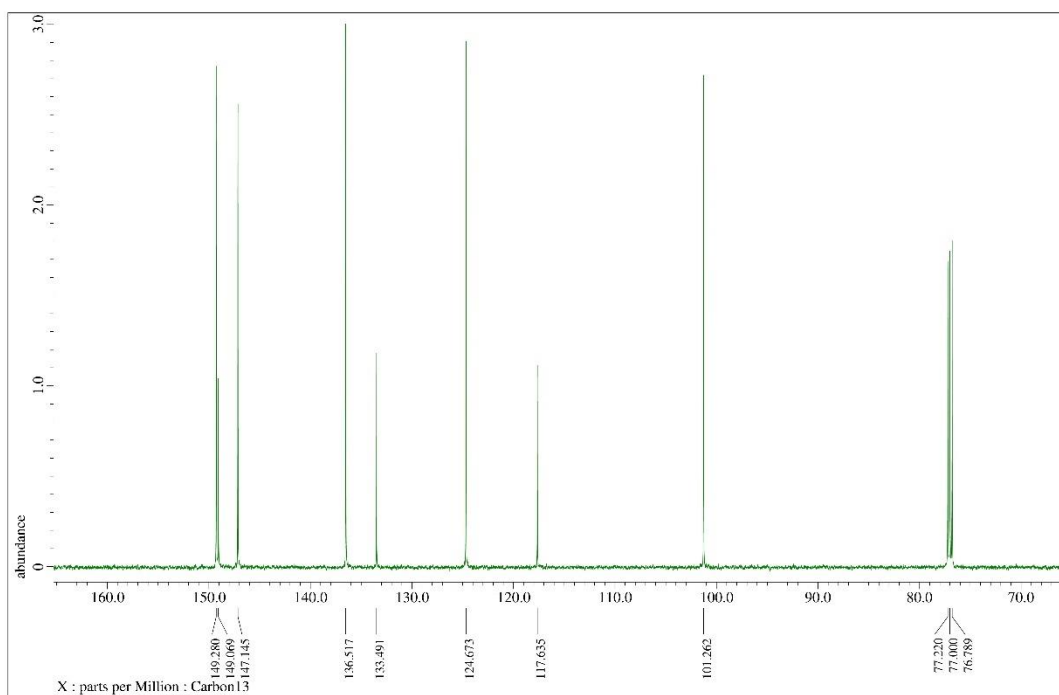

150 MHz, CDCl<sub>3</sub>

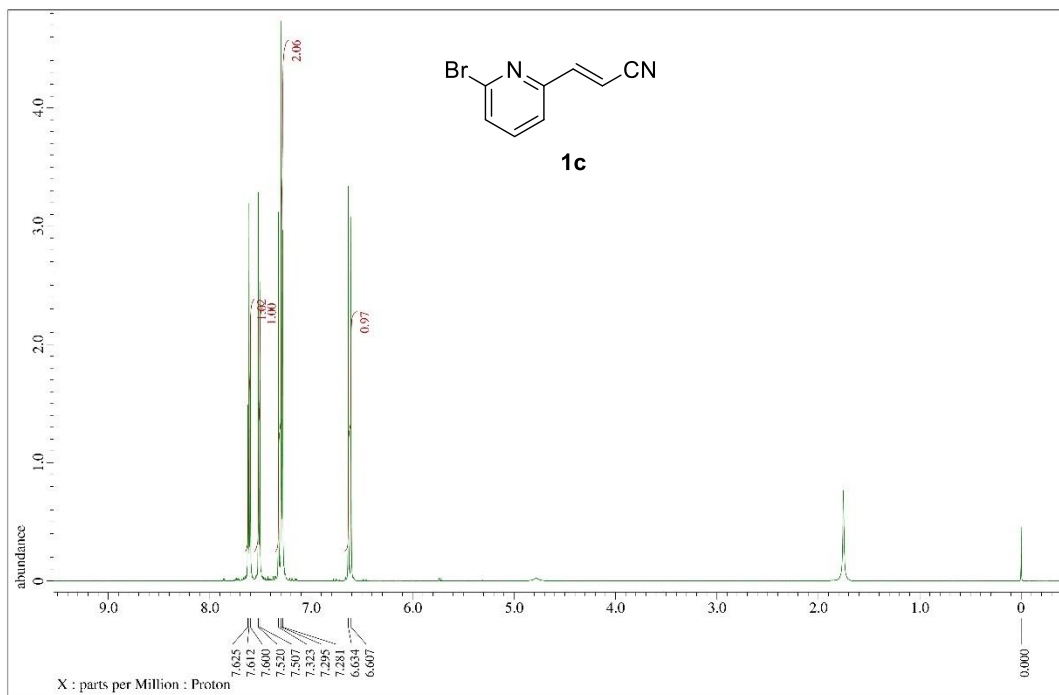

600 MHz, CDCl<sub>3</sub>

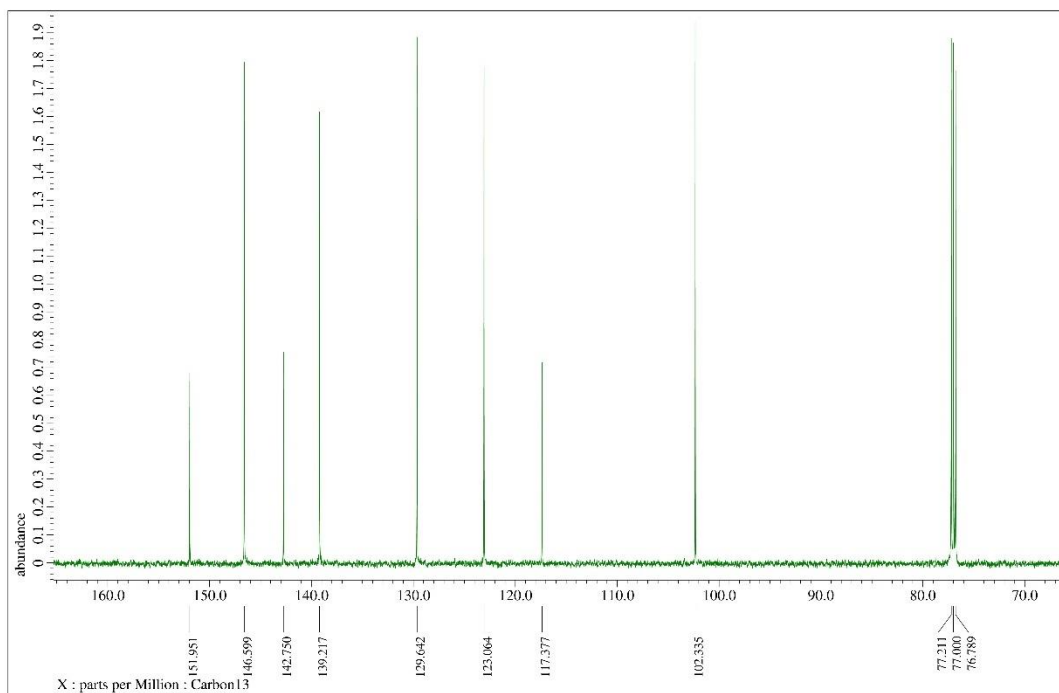

150 MHz, CDCl<sub>3</sub>

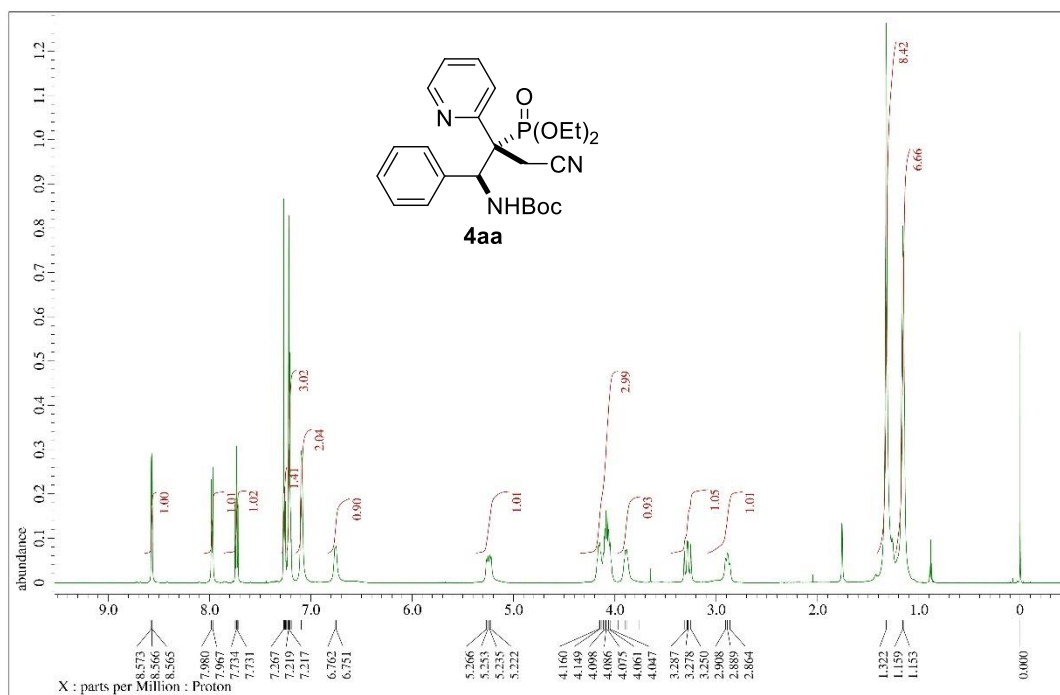

600 MHz, CDCl<sub>3</sub>

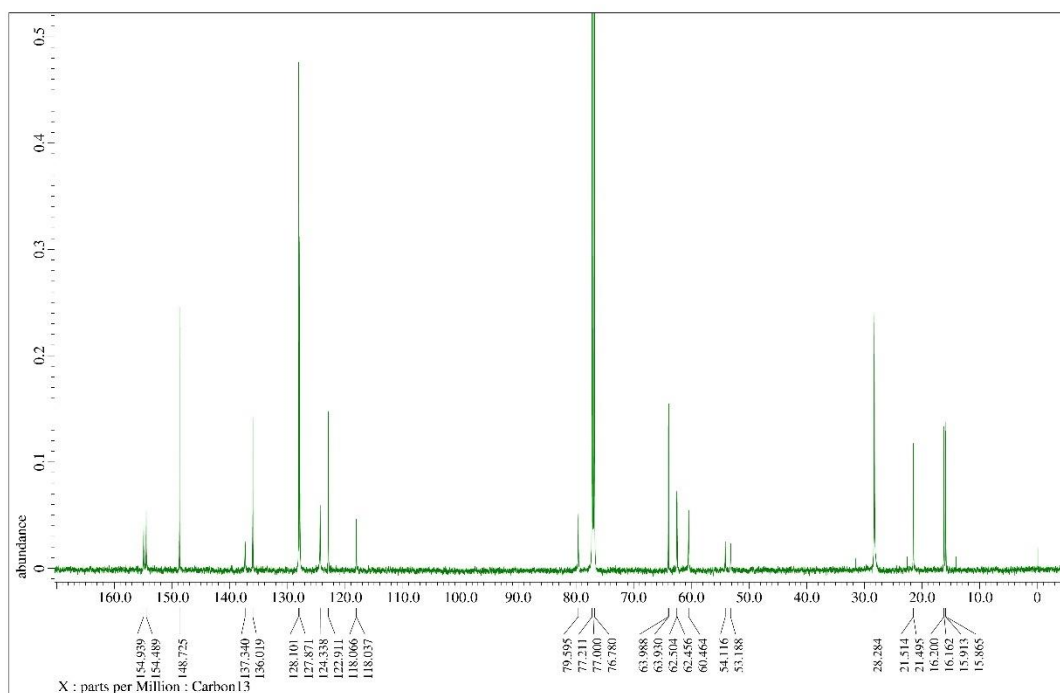

150 MHz, CDCl<sub>3</sub>

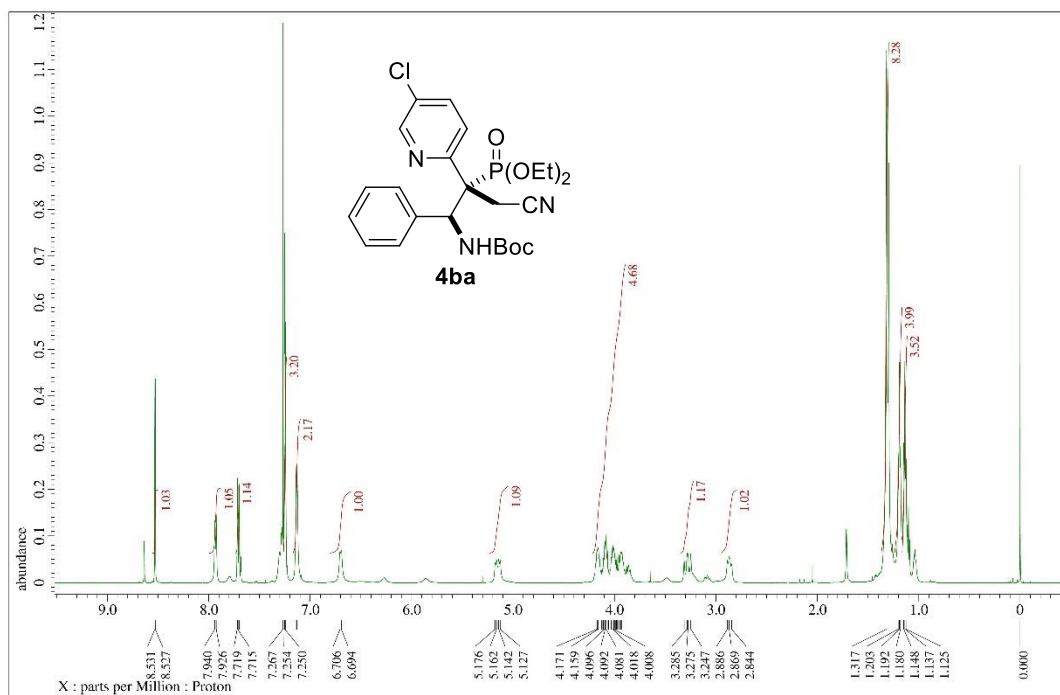

600 MHz, CDCl<sub>3</sub>

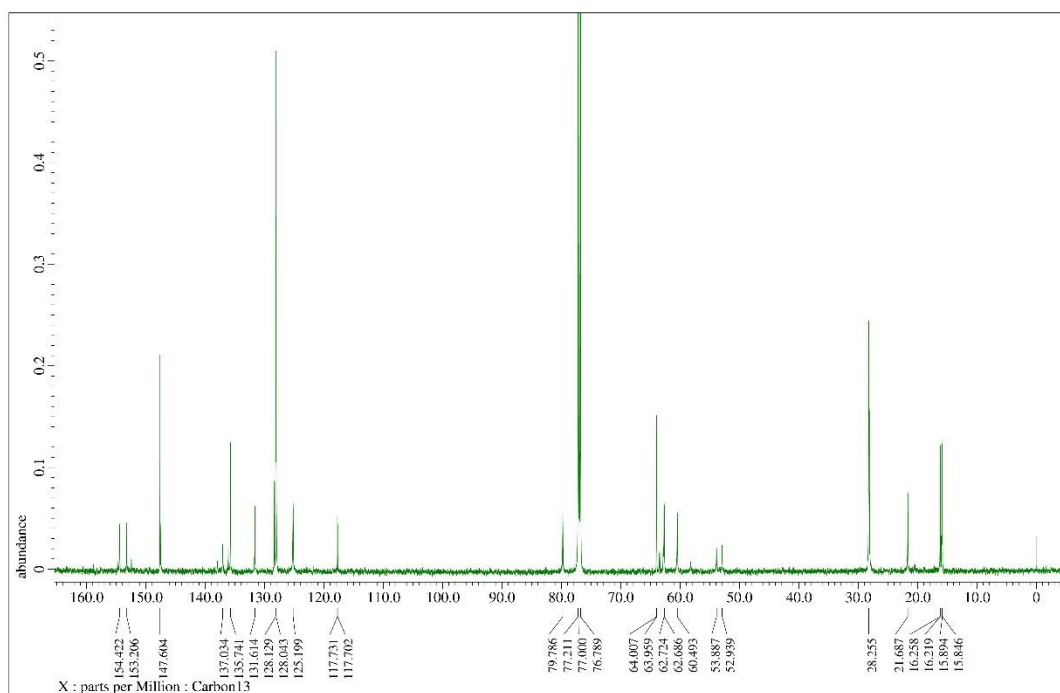

150 MHz, CDCl<sub>3</sub>

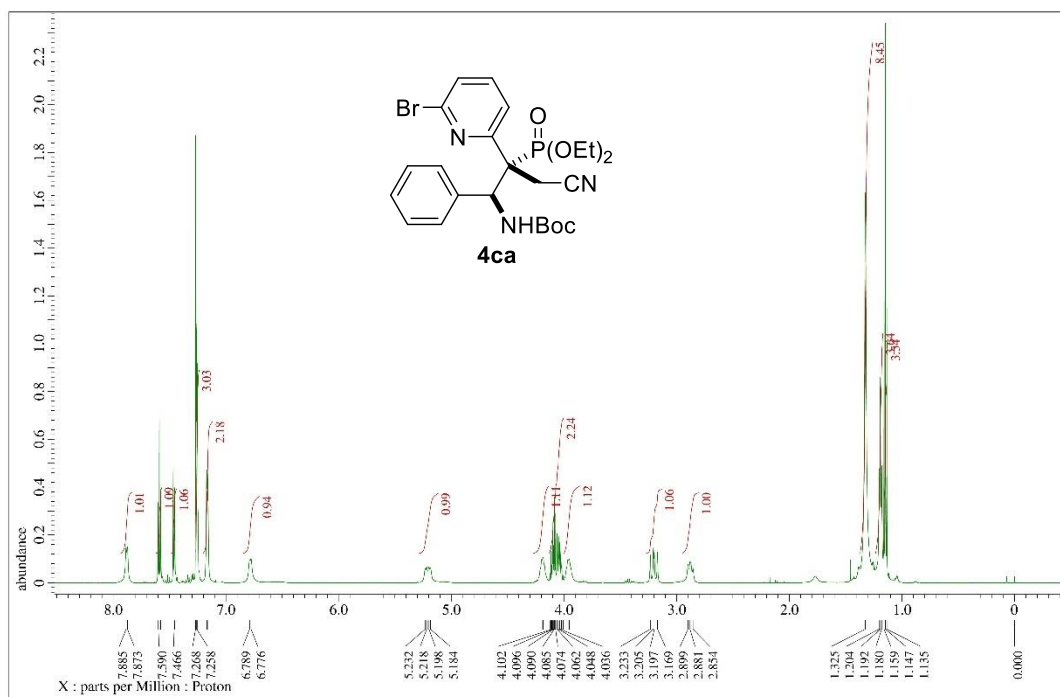

600 MHz, CDCl<sub>3</sub>

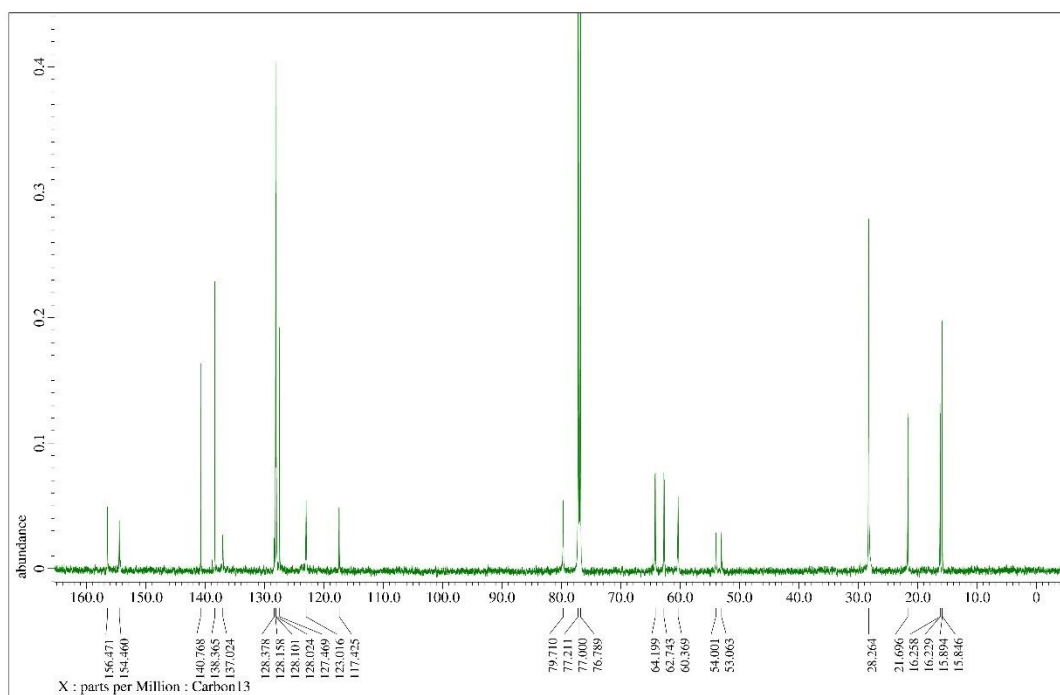

150 MHz, CDCl<sub>3</sub>



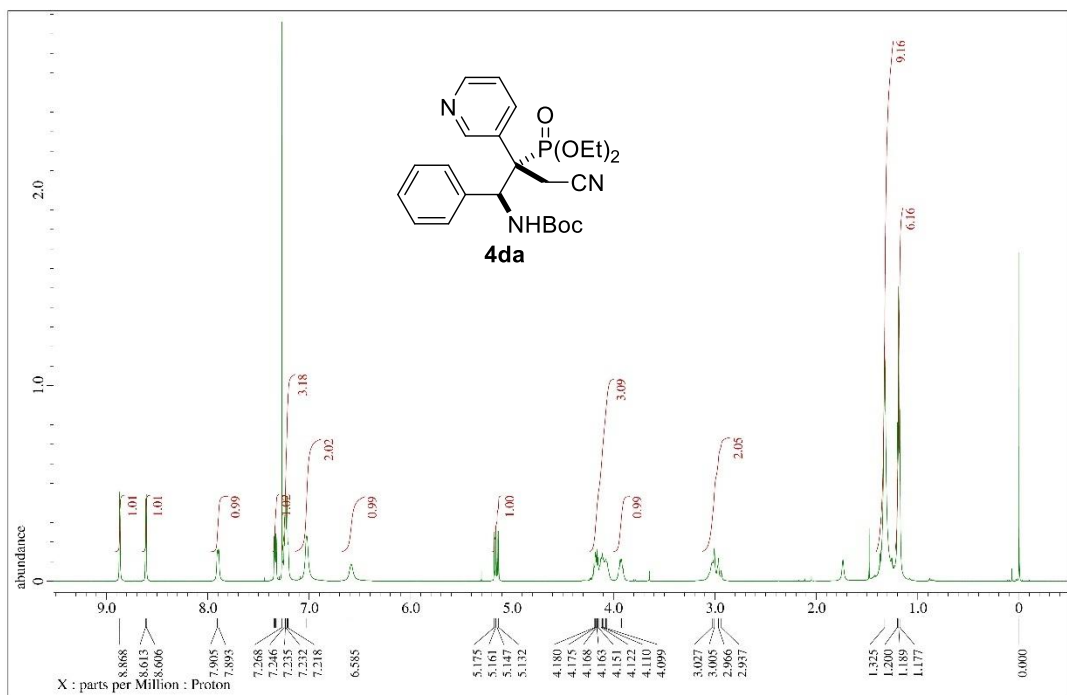

600 MHz, CDCl<sub>3</sub>

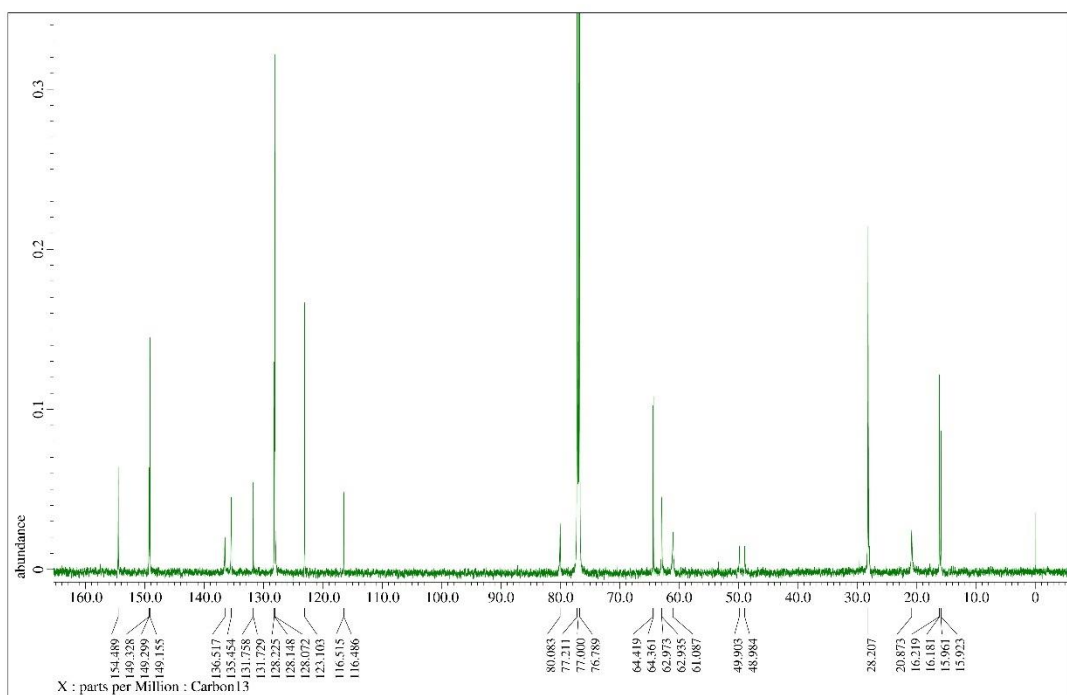

150 MHz, CDCl<sub>3</sub>

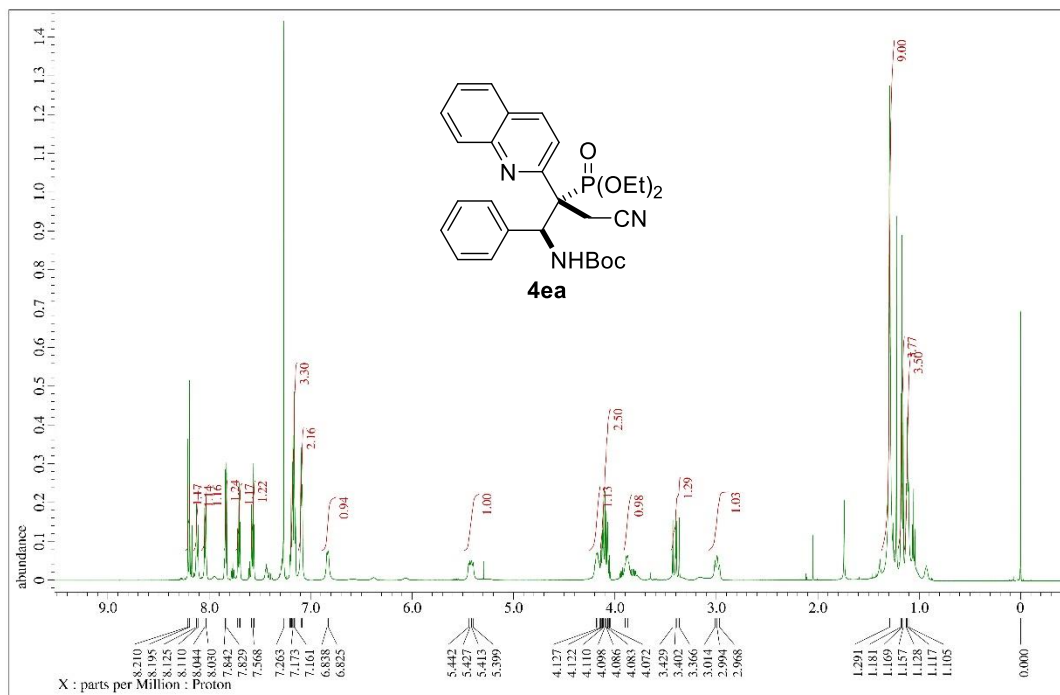

600 MHz, CDCl<sub>3</sub>

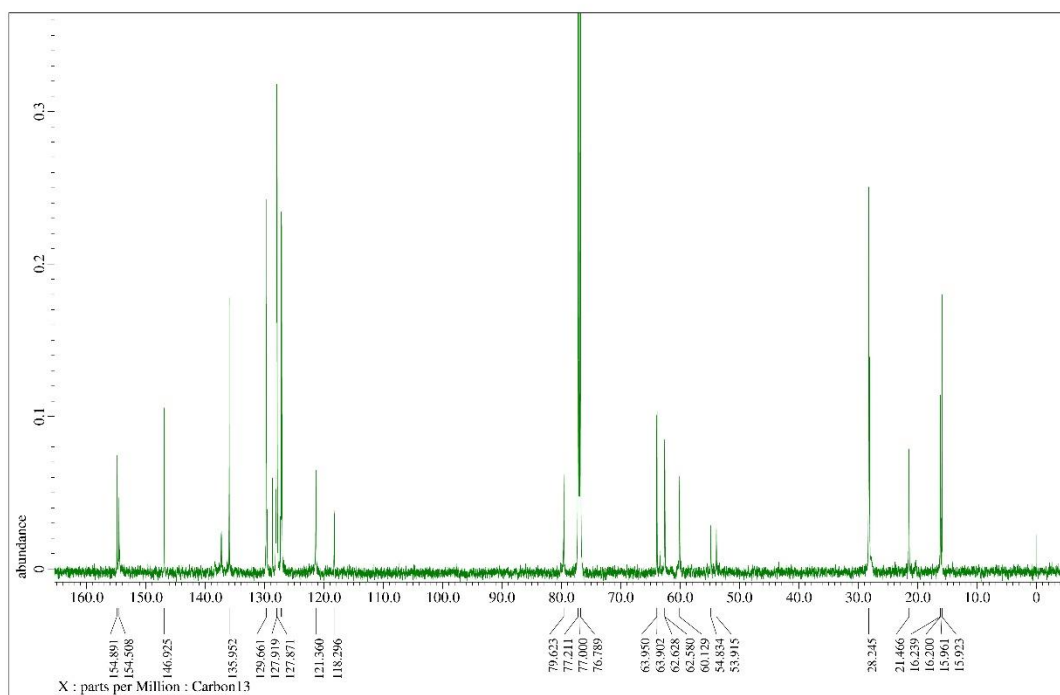

150 MHz, CDCl<sub>3</sub>

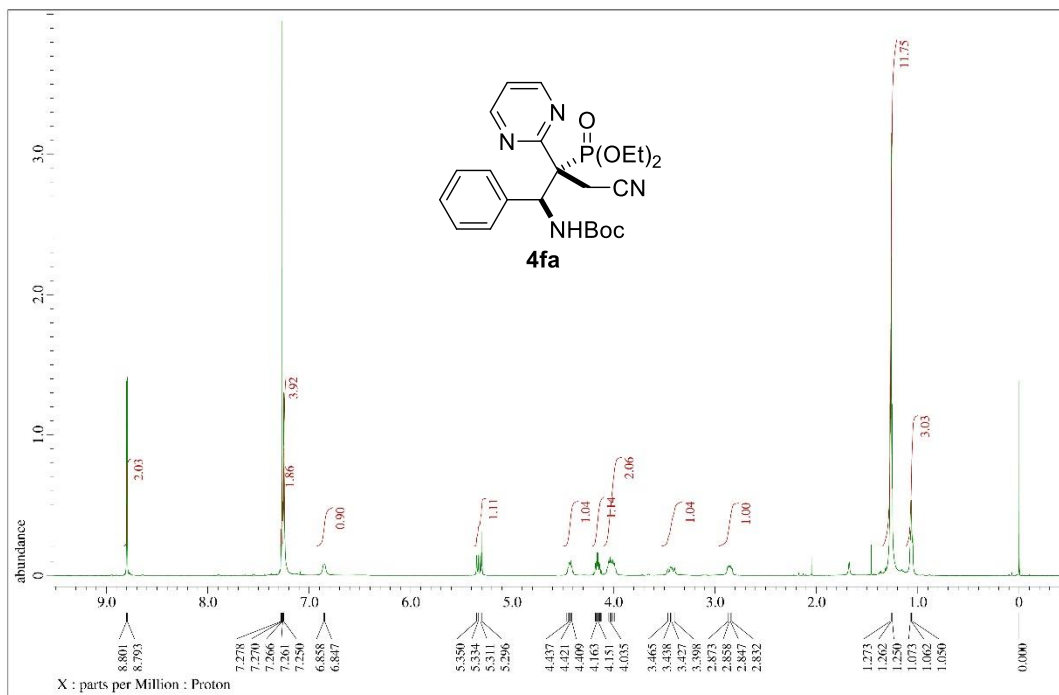

600 MHz, CDCl<sub>3</sub>

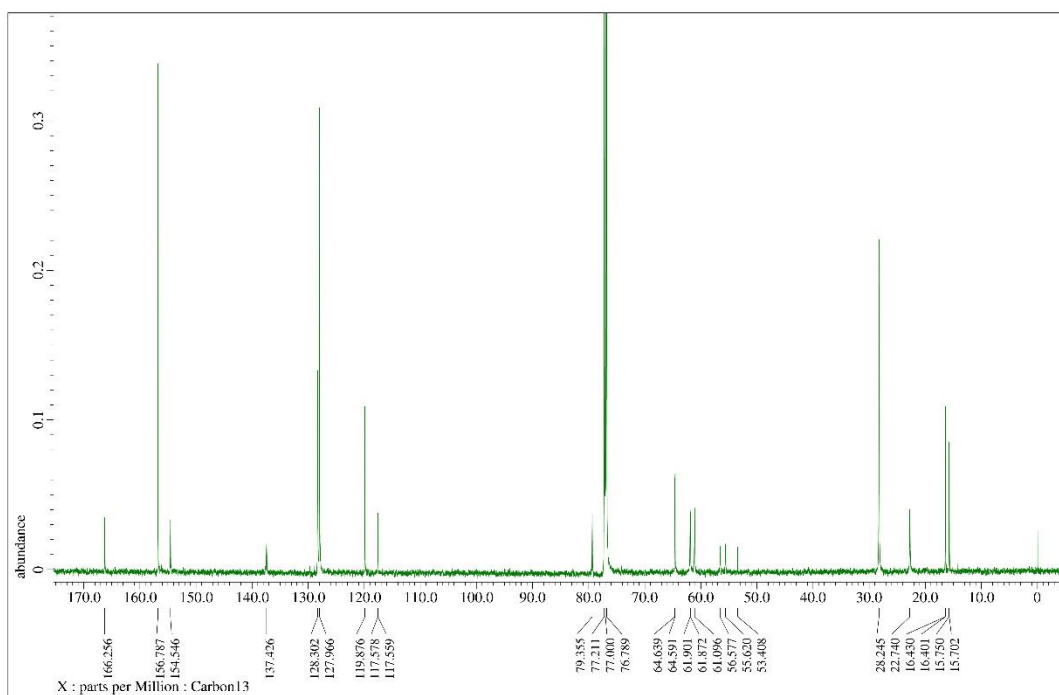

150 MHz, CDCl<sub>3</sub>

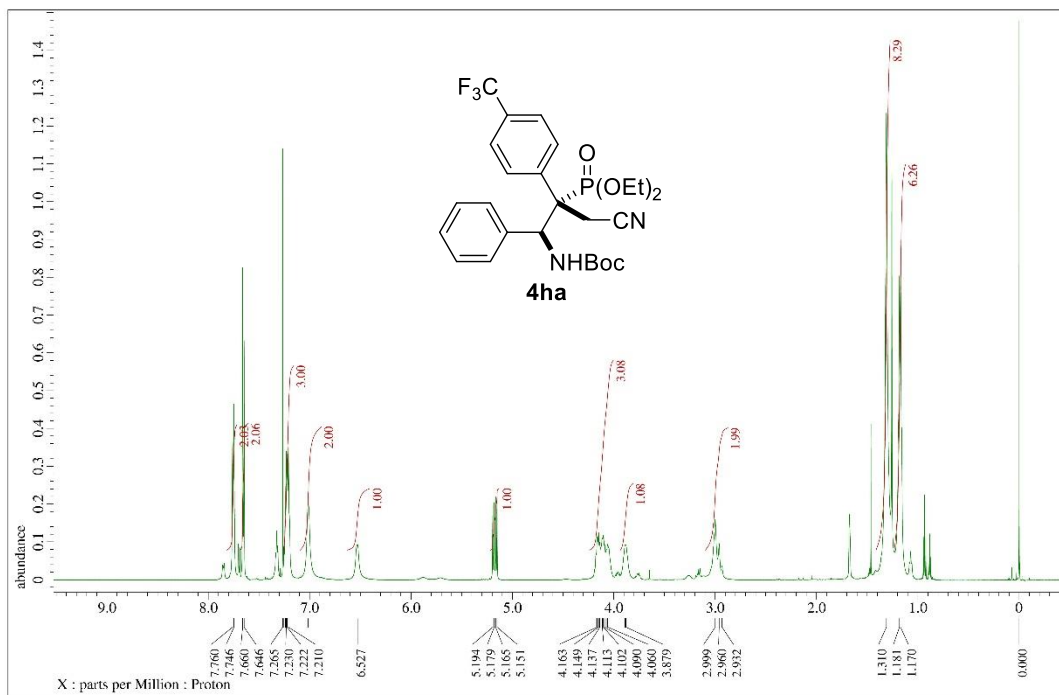

600 MHz, CDCl<sub>3</sub>

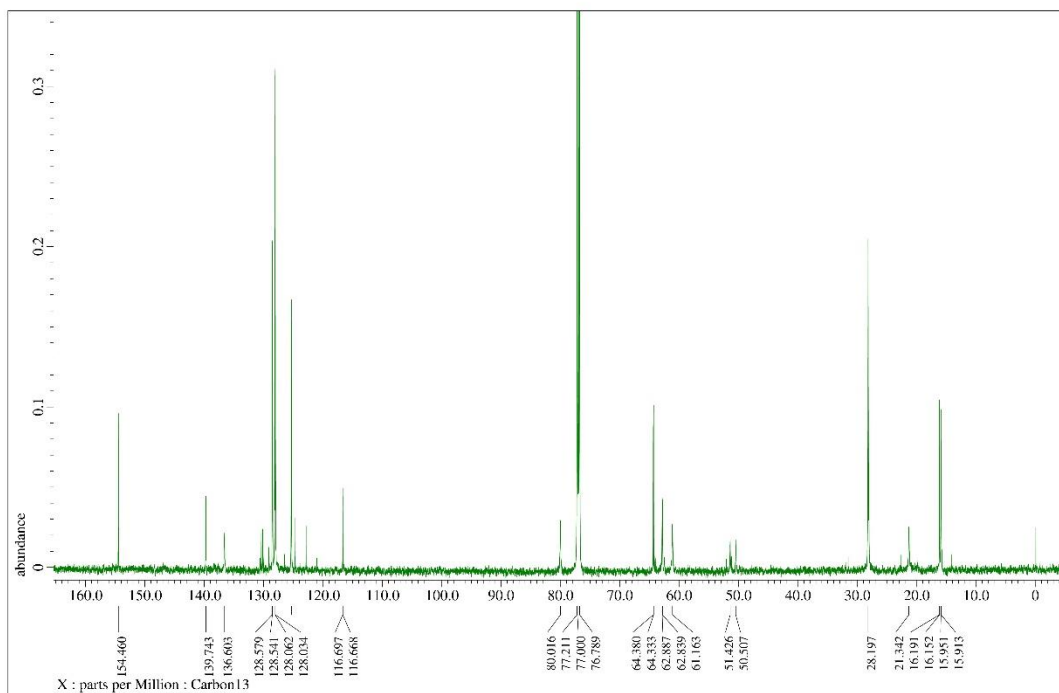

150 MHz, CDCl<sub>3</sub>

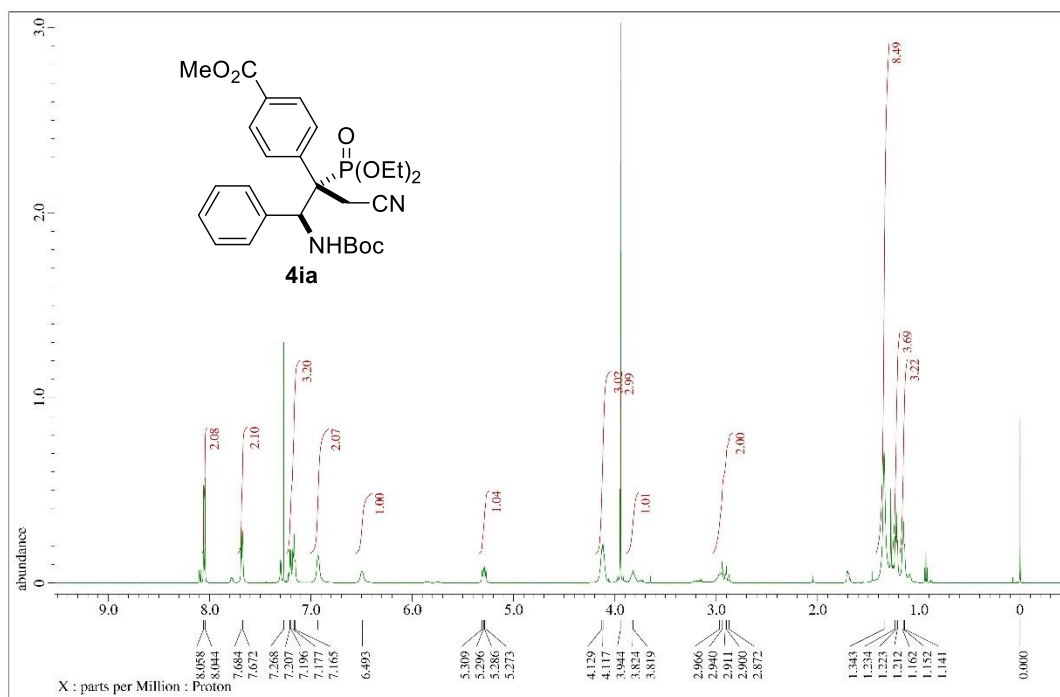

600 MHz, CDCl<sub>3</sub>

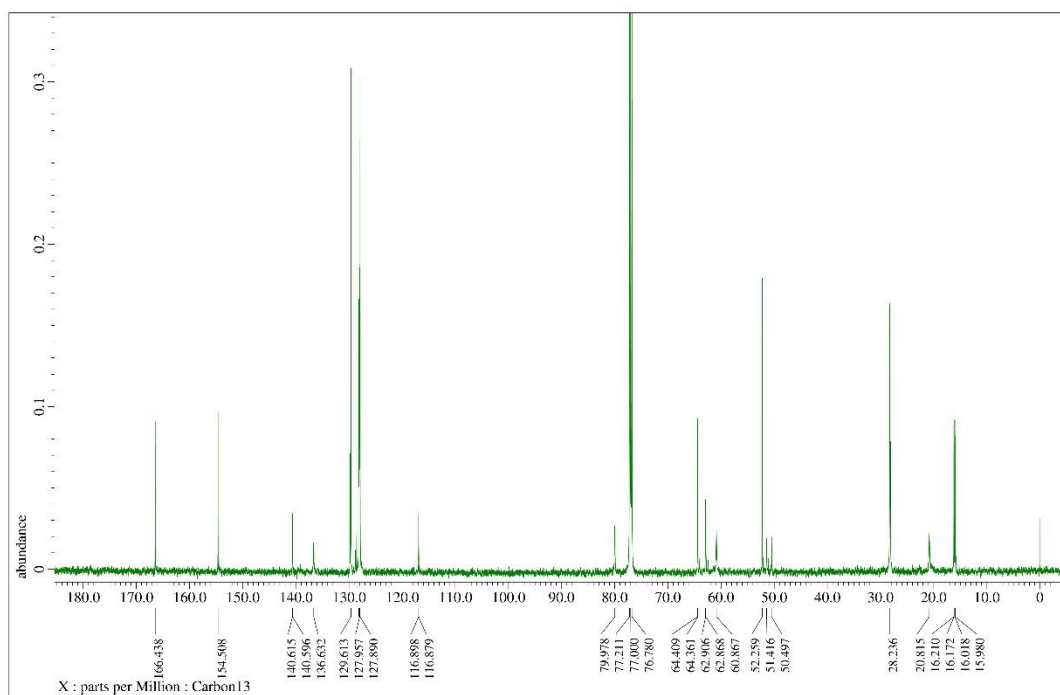

150 MHz, CDCl<sub>3</sub>

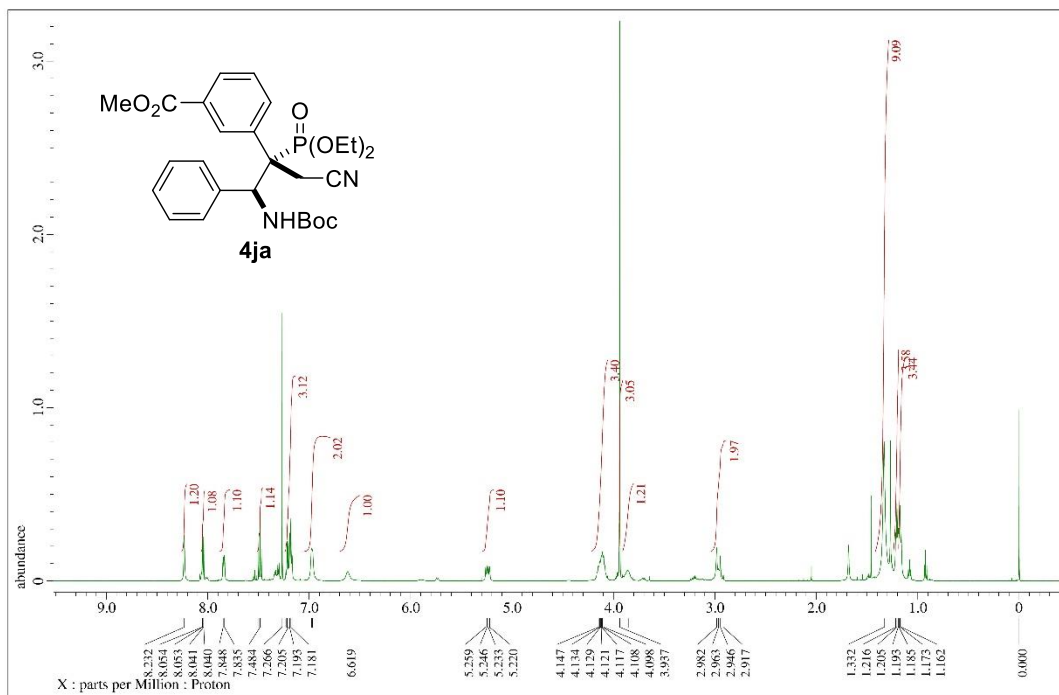

600 MHz, CDCl<sub>3</sub>

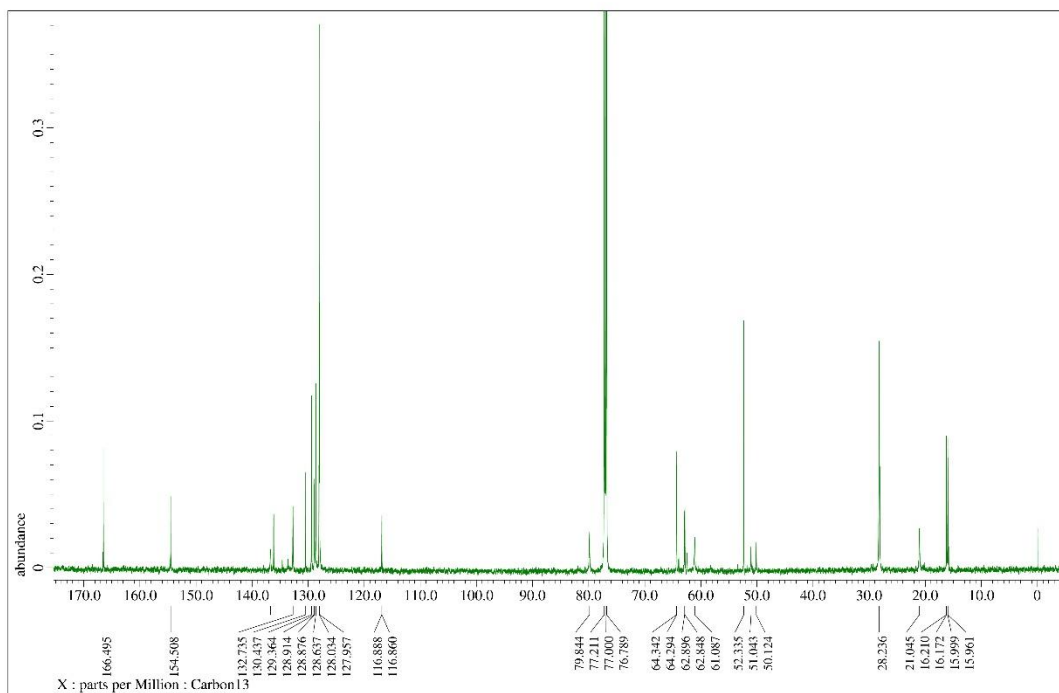

150 MHz, CDCl<sub>3</sub>

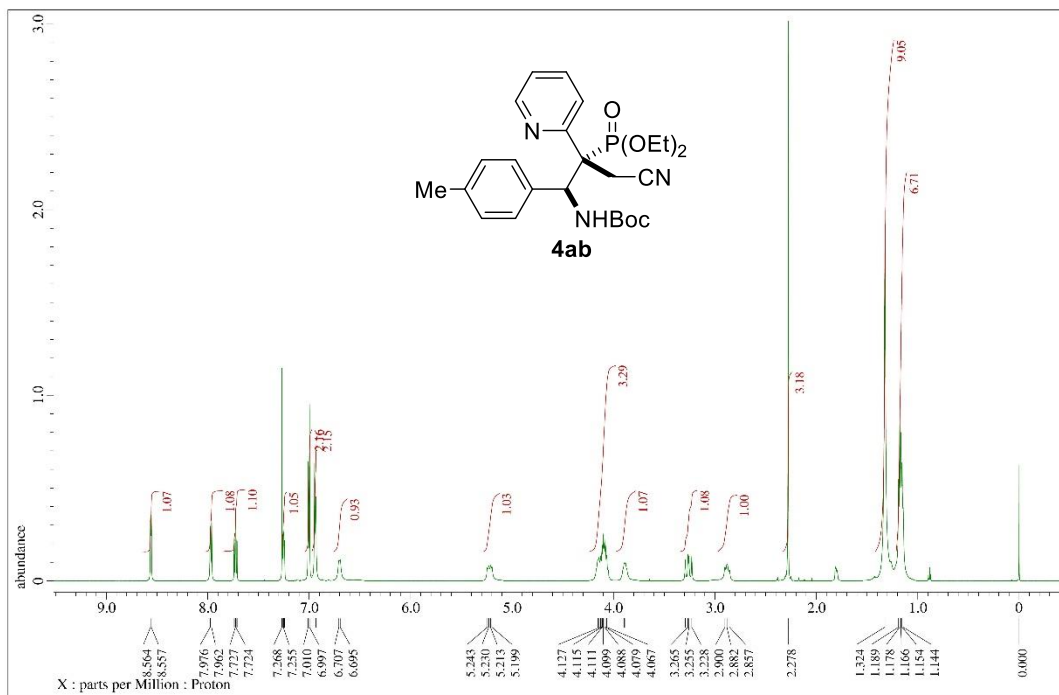

600 MHz, CDCl<sub>3</sub>

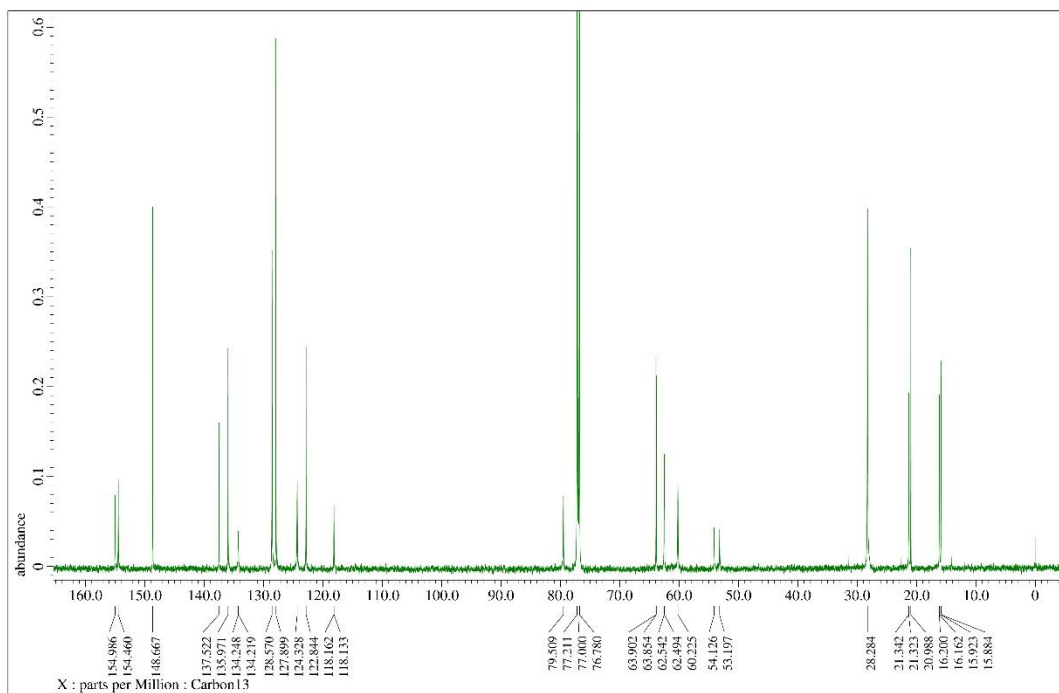

150 MHz, CDCl<sub>3</sub>

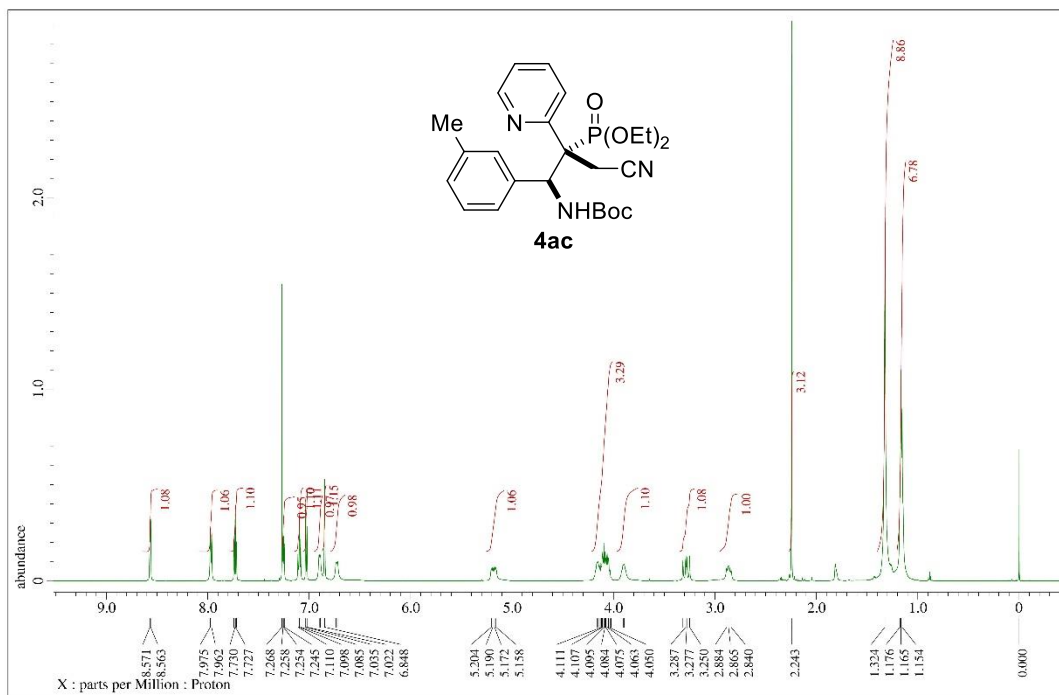

600 MHz, CDCl<sub>3</sub>

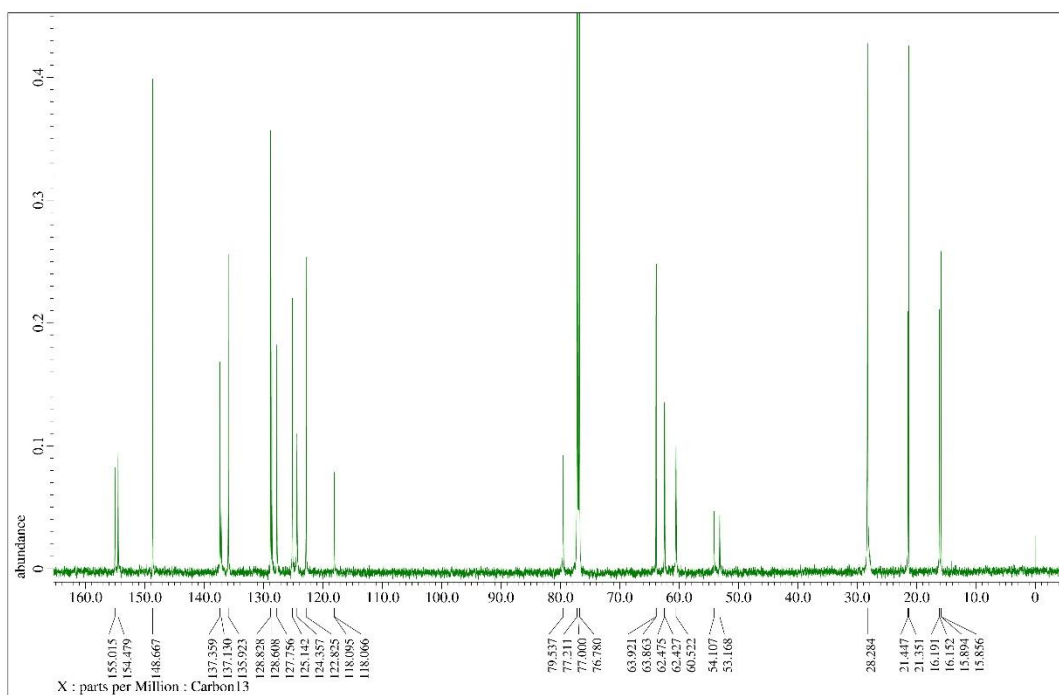

150 MHz, CDCl<sub>3</sub>



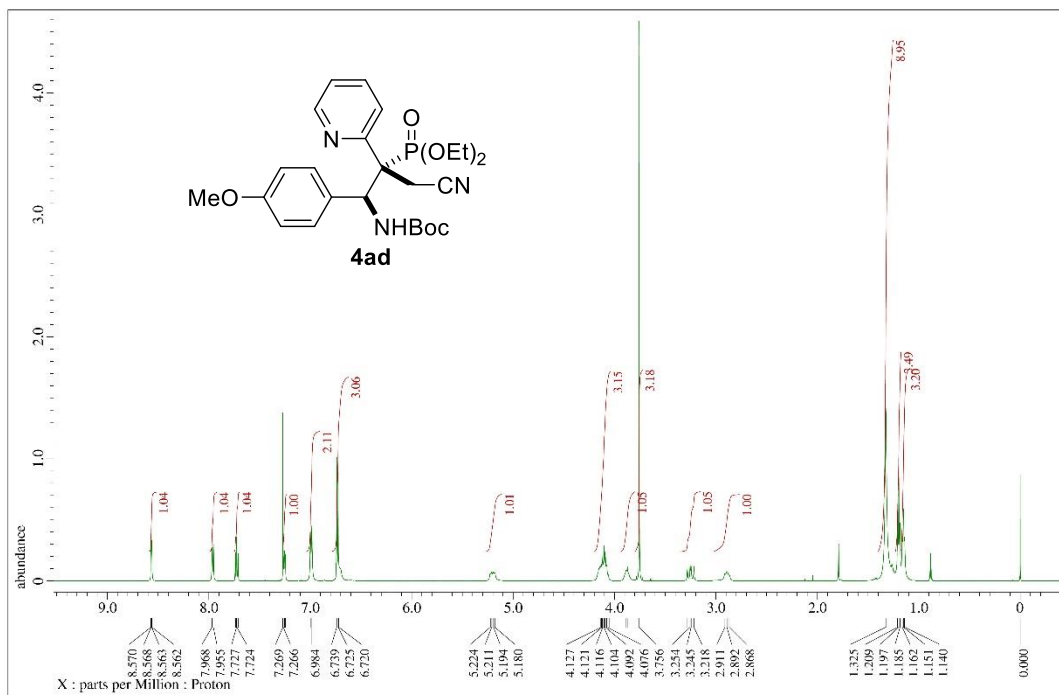

600 MHz, CDCl<sub>3</sub>

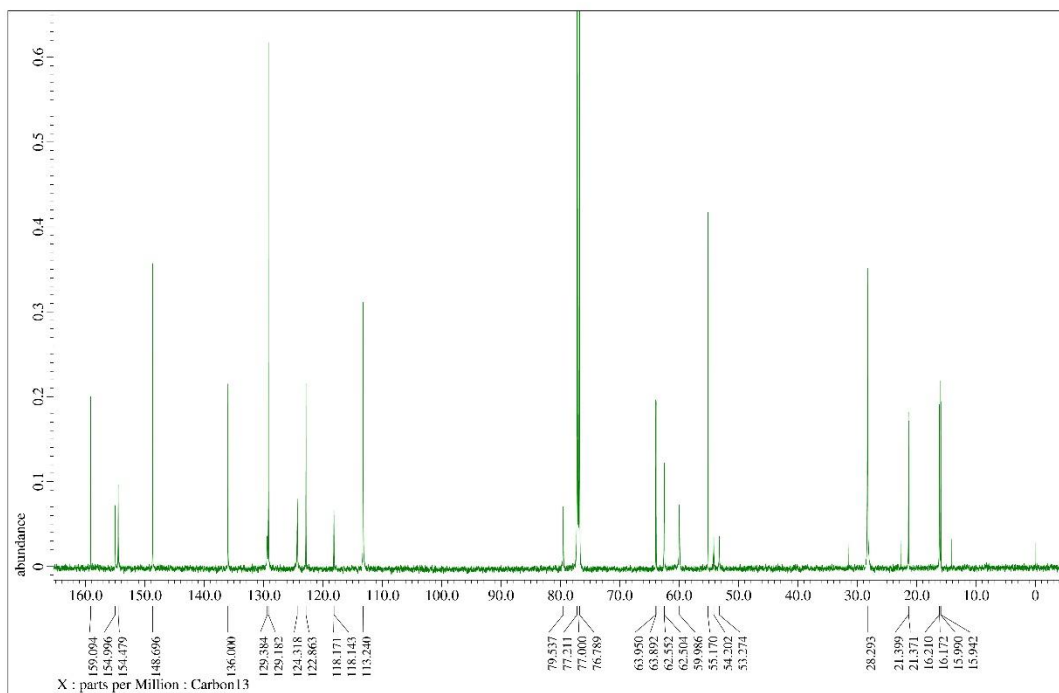

150 MHz, CDCl<sub>3</sub>

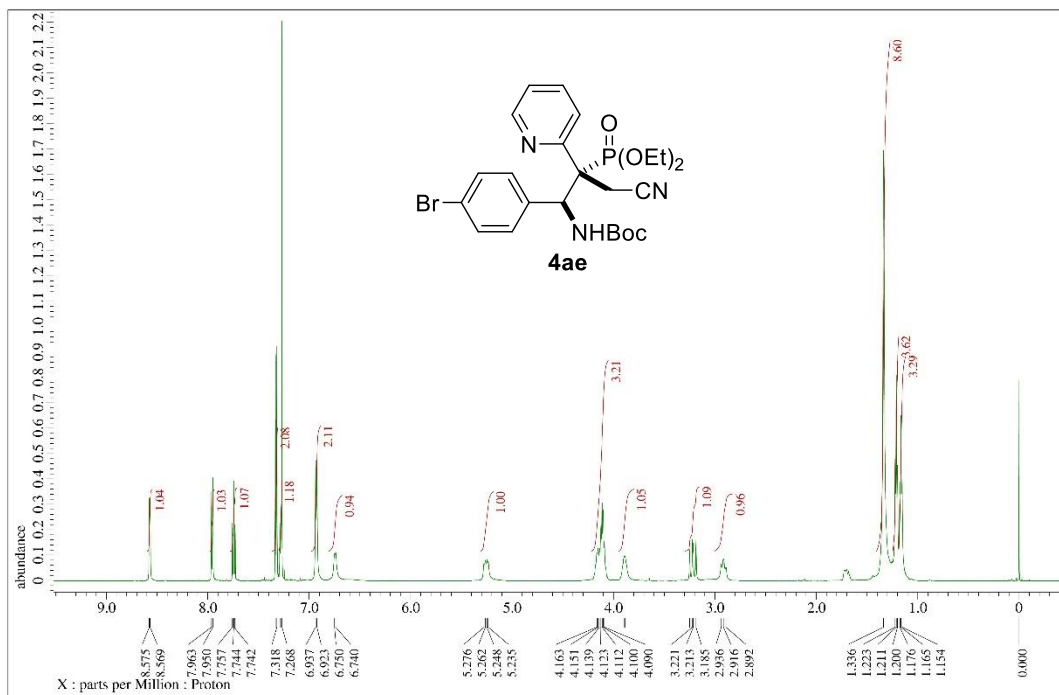

600 MHz, CDCl<sub>3</sub>

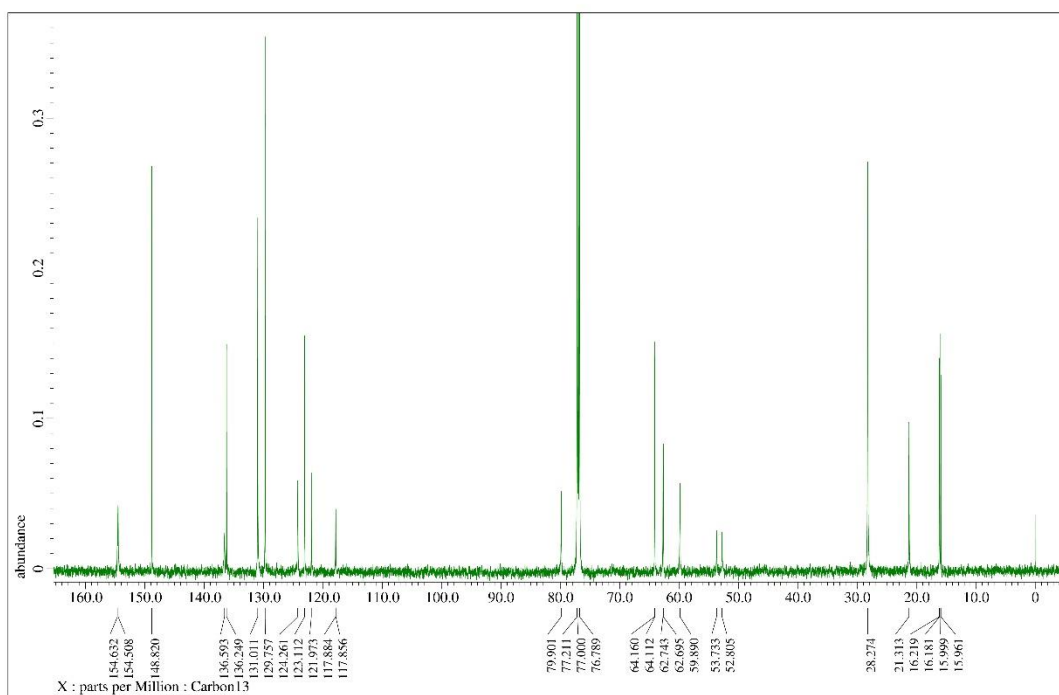

150 MHz, CDCl<sub>3</sub>

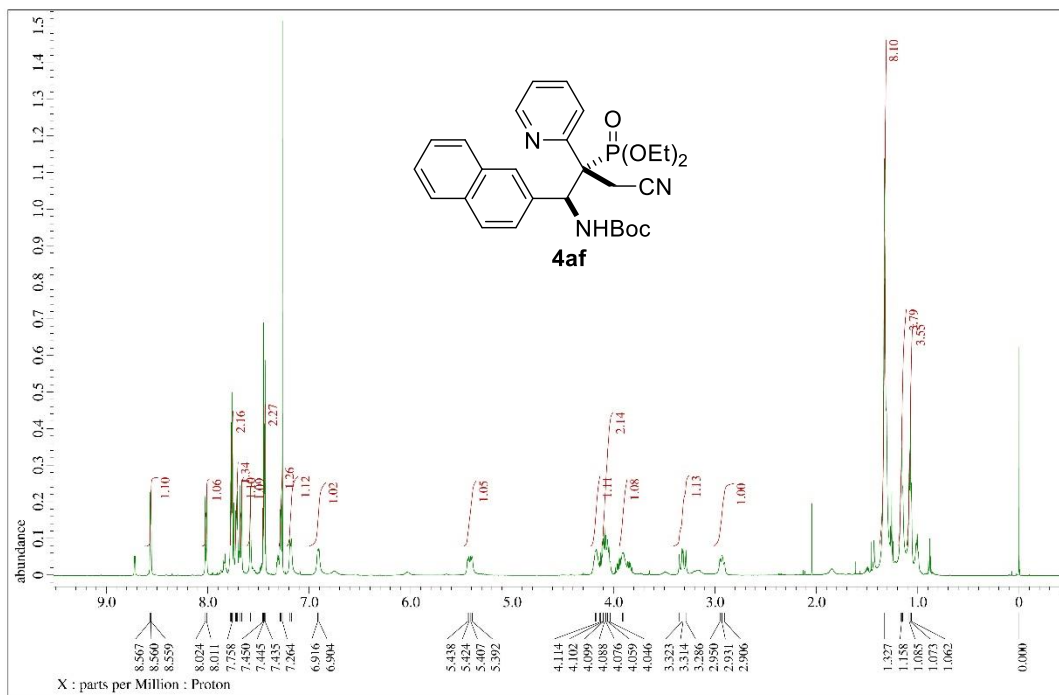

600 MHz, CDCl<sub>3</sub>

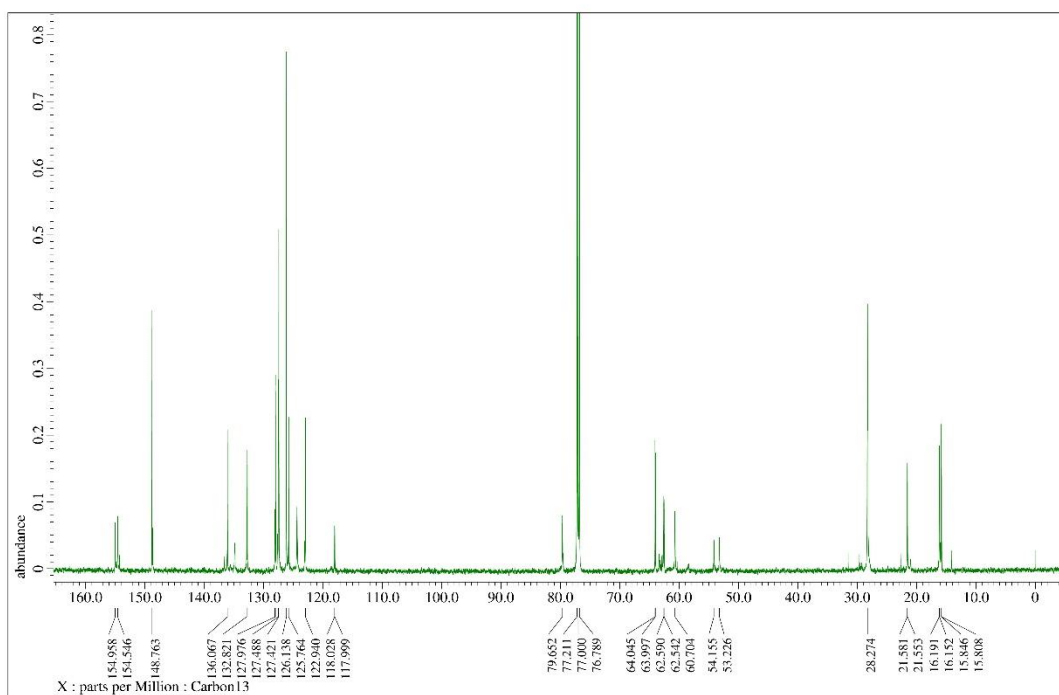

150 MHz, CDCl<sub>3</sub>

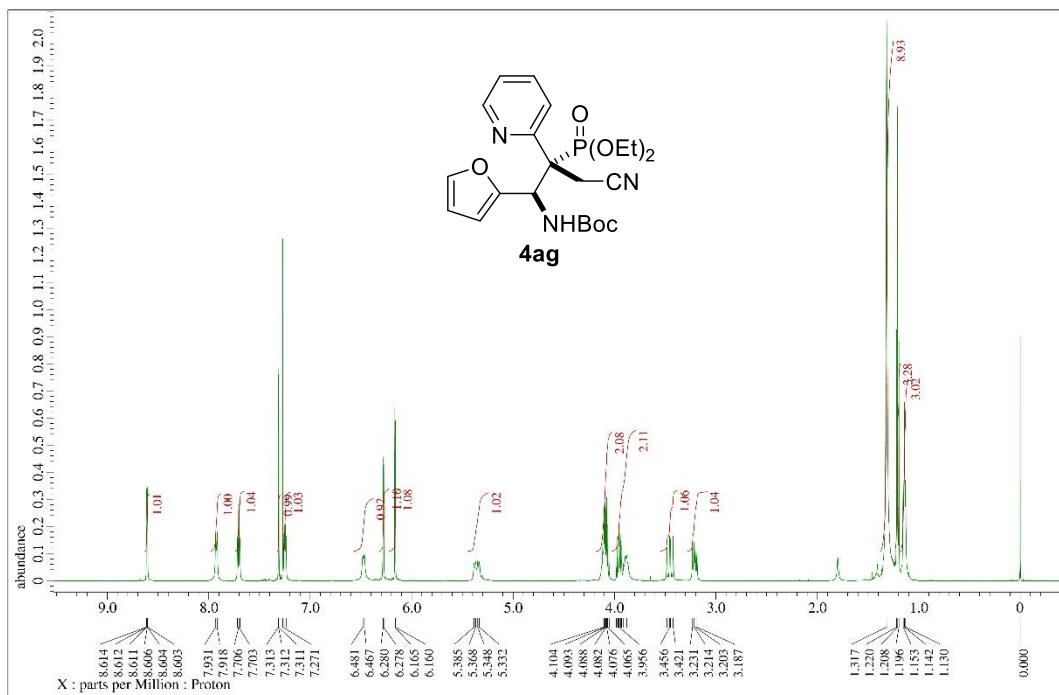

600 MHz, CDCl<sub>3</sub>

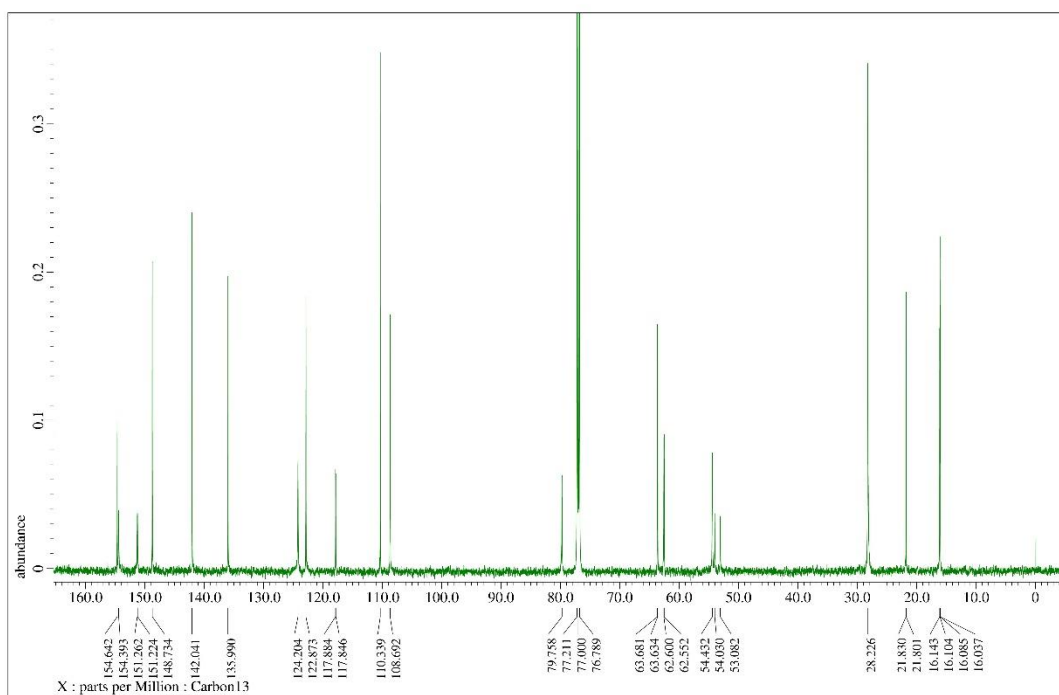

150 MHz, CDCl<sub>3</sub>

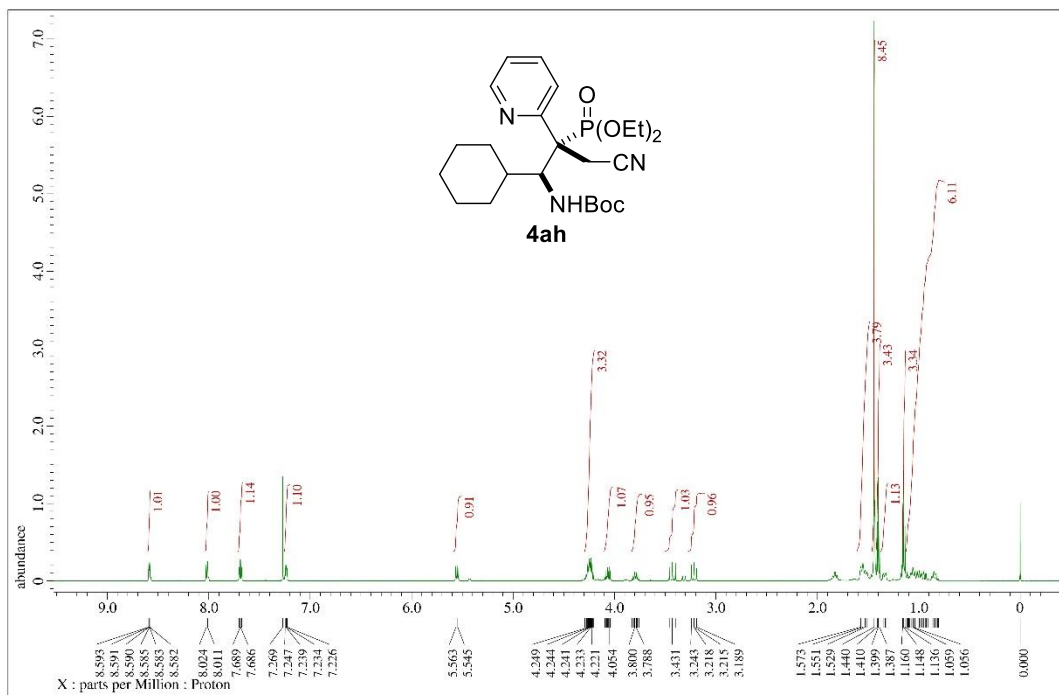

600 MHz, CDCl<sub>3</sub>

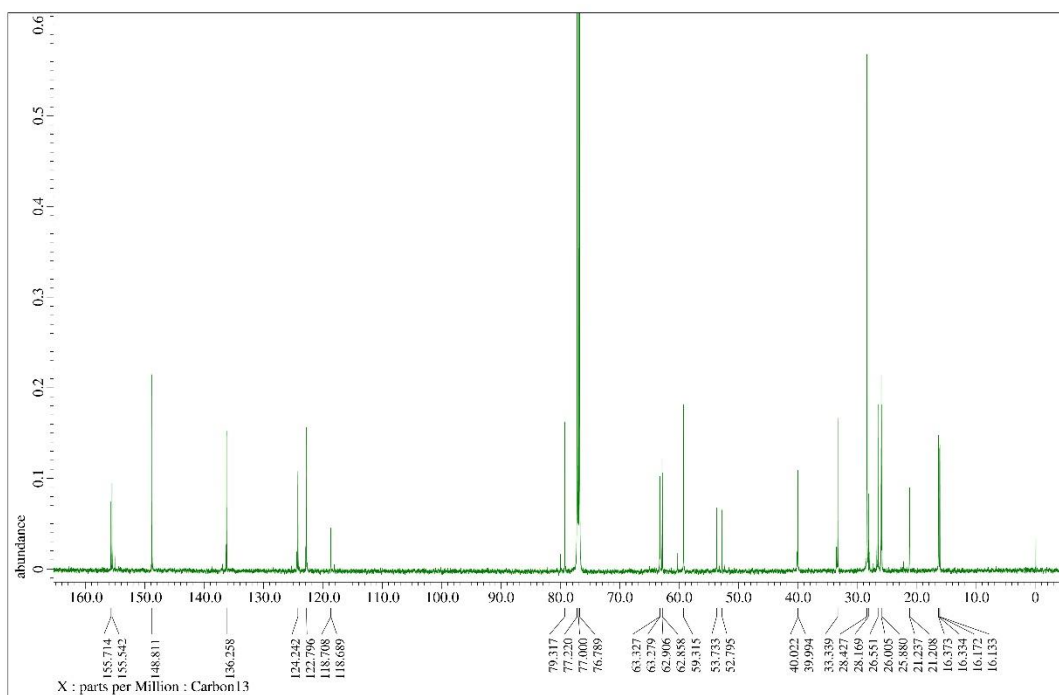

150 MHz, CDCl<sub>3</sub>

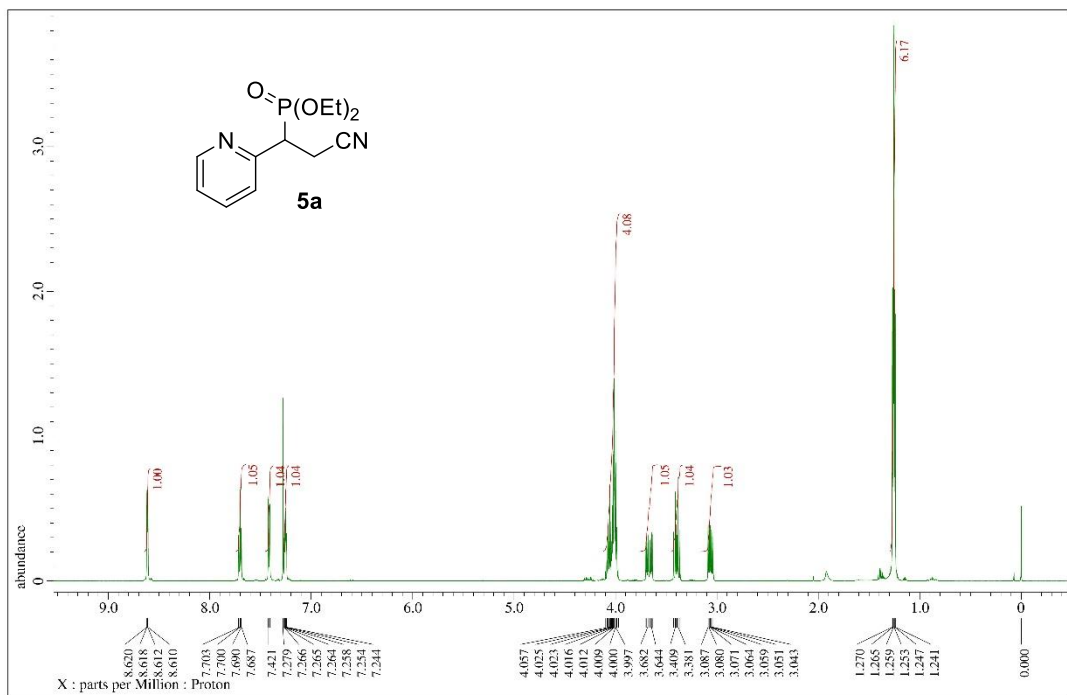

600 MHz, CDCl<sub>3</sub>

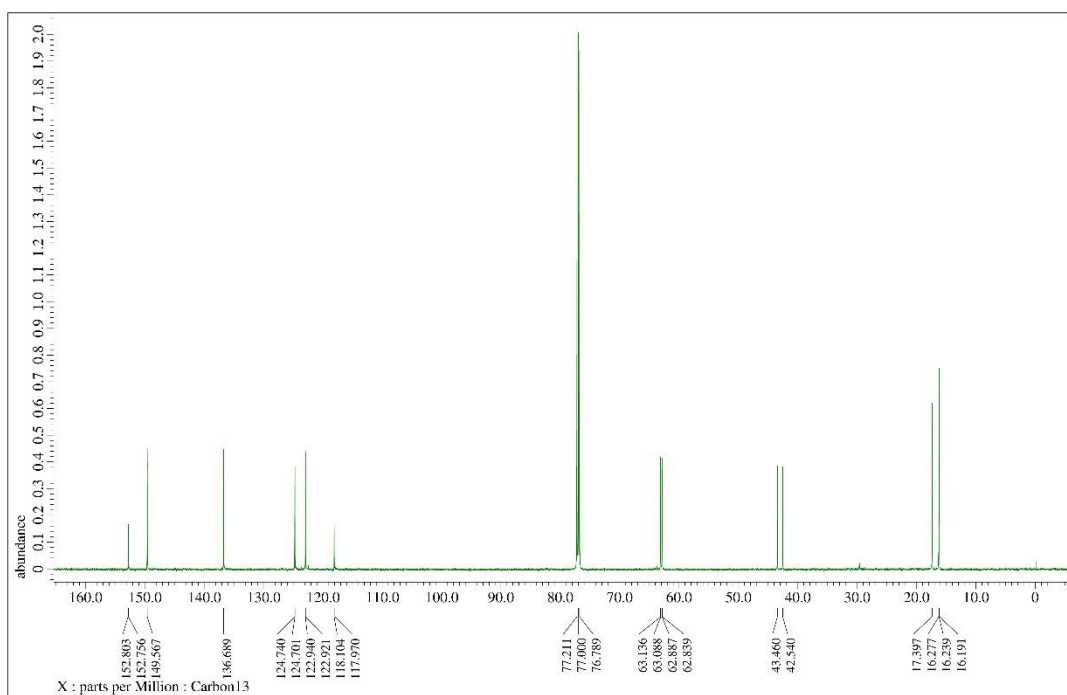

150 MHz, CDCl<sub>3</sub>

## X-ray Structure Reports

**Table S1. Crystal data and structure refinement for 4aa.**

|                                             |                                                                               |
|---------------------------------------------|-------------------------------------------------------------------------------|
| Identification code                         | <b>4aa</b>                                                                    |
| Empirical formula                           | C <sub>48</sub> H <sub>64</sub> N <sub>6</sub> O <sub>10</sub> P <sub>2</sub> |
| Formula weight                              | 946.99                                                                        |
| Temperature/K                               | 100(2)                                                                        |
| Crystal system                              | monoclinic                                                                    |
| Space group                                 | P2 <sub>1</sub> /n                                                            |
| a/Å                                         | 11.38560(10)                                                                  |
| b/Å                                         | 21.6393(3)                                                                    |
| c/Å                                         | 20.1707(3)                                                                    |
| α/°                                         | 90                                                                            |
| β/°                                         | 96.0230(10)                                                                   |
| γ/°                                         | 90                                                                            |
| Volume/Å <sup>3</sup>                       | 4942.15(11)                                                                   |
| Z                                           | 4                                                                             |
| ρ <sub>calc</sub> /cm <sup>3</sup>          | 1.273                                                                         |
| μ/mm <sup>-1</sup>                          | 0.150                                                                         |
| F(000)                                      | 2016.0                                                                        |
| Crystal size/mm <sup>3</sup>                | 0.2 × 0.15 × 0.05                                                             |
| Radiation                                   | Mo Kα (λ = 0.71073)                                                           |
| 2θ range for data collection/°              | 4.476 to 61.904                                                               |
| Index ranges                                | -15 ≤ h ≤ 16, -30 ≤ k ≤ 30, -28 ≤ l ≤ 27                                      |
| Reflections collected                       | 135824                                                                        |
| Independent reflections                     | 13787 [R <sub>int</sub> = 0.0631, R <sub>sigma</sub> = 0.0350]                |
| Data/restraints/parameters                  | 13787/0/613                                                                   |
| Goodness-of-fit on F <sup>2</sup>           | 1.038                                                                         |
| Final R indexes [I ≥ 2σ (I)]                | R <sub>1</sub> = 0.0374, wR <sub>2</sub> = 0.0932                             |
| Final R indexes [all data]                  | R <sub>1</sub> = 0.0513, wR <sub>2</sub> = 0.1003                             |
| Largest diff. peak/hole / e Å <sup>-3</sup> | 0.52/-0.41                                                                    |

**Table S2. Fractional Atomic Coordinates ( $\times 10^4$ ) and Equivalent Isotropic Displacement Parameters ( $\text{\AA}^2 \times 10^3$ ) for 4aa.  $U_{\text{eq}}$  is defined as 1/3 of the trace of the orthogonalised  $U_{\text{IJ}}$  tensor.**

| Atom | x          | y         | z         | U(eq)     |
|------|------------|-----------|-----------|-----------|
| P15  | 5341.2(3)  | 3957.2(2) | 5807.7(2) | 14.92(7)  |
| P48  | 3474.4(2)  | 1380.4(2) | 6375.1(2) | 14.11(6)  |
| O43  | 6710.0(7)  | 1250.8(4) | 5069.2(4) | 15.65(16) |
| O25  | 4518.0(7)  | 4462.2(4) | 5614.8(4) | 19.29(17) |
| O27  | 2013.2(7)  | 3959.0(4) | 4880.9(4) | 18.65(17) |
| O10  | 1750.1(7)  | 3488.9(4) | 5867.1(4) | 18.52(17) |
| O60  | 5561.8(7)  | 523.2(4)  | 4500.5(4) | 18.76(17) |
| O49  | 2772.2(7)  | 863.9(4)  | 5956.6(4) | 18.68(17) |
| O52  | 2715.8(7)  | 1482.9(4) | 6974.8(4) | 17.78(16) |
| O16  | 5084.8(8)  | 3575.3(4) | 6445.2(4) | 21.64(18) |
| O19  | 6664.6(7)  | 4170.8(4) | 5972.7(4) | 18.87(17) |
| O58  | 3712.3(7)  | 1955.7(4) | 6025.2(4) | 19.60(17) |
| N8   | 3226.1(8)  | 3187.6(5) | 5306.1(5) | 15.46(18) |
| N41  | 5293.3(9)  | 771.6(5)  | 5563.8(5) | 15.53(18) |
| N28  | 7026.4(8)  | 3182.6(4) | 4520.8(5) | 16.25(19) |
| N61  | 5238.0(9)  | 977.8(5)  | 7926.2(5) | 20.8(2)   |
| N24  | 7714.6(10) | 2713.5(5) | 6318.4(6) | 25.5(2)   |
| N57  | 2637.5(10) | 19.5(5)   | 7406.9(6) | 26.4(2)   |
| C42  | 5850.6(10) | 826.5(5)  | 5003.5(5) | 14.5(2)   |
| C9   | 2297.1(10) | 3582.4(5) | 5314.0(5) | 15.2(2)   |
| C14  | 5365.2(9)  | 3345.1(5) | 5175.2(5) | 13.3(2)   |
| C1   | 3967.7(9)  | 2791.2(5) | 4270.6(6) | 15.4(2)   |
| C7   | 4070.8(9)  | 3276.0(5) | 4822.4(5) | 14.0(2)   |
| C29  | 6161.4(9)  | 3564.4(5) | 4655.5(5) | 14.2(2)   |
| C34  | 6954.3(10) | 724.7(5)  | 6466.5(5) | 15.4(2)   |
| C55  | 4556.6(10) | 277.8(5)  | 6860.9(6) | 16.7(2)   |
| C62  | 5252.8(9)  | 1306.7(5) | 7364.7(5) | 16.0(2)   |
| C22  | 5796.4(10) | 2723.9(5) | 5487.5(6) | 15.6(2)   |
| C39  | 7166.4(11) | 96.0(5)   | 6385.6(6) | 19.9(2)   |
| C33  | 7721.1(10) | 3365.7(6) | 4061.1(6) | 19.4(2)   |
| C6   | 3795.9(10) | 2166.7(5) | 4402.8(6) | 19.3(2)   |
| C40  | 5772.2(10) | 1017.8(5) | 6211.7(5) | 14.3(2)   |



**Table S2. Fractional Atomic Coordinates ( $\times 10^4$ ) and Equivalent Isotropic Displacement Parameters ( $\text{\AA}^2 \times 10^3$ ) for 4aa.  $U_{\text{eq}}$  is defined as 1/3 of the trace of the orthogonalised  $U_{\text{IJ}}$  tensor.**

| Atom | x          | y         | z         | U(eq)   |
|------|------------|-----------|-----------|---------|
| C47  | 4815.5(10) | 967.0(5)  | 6715.3(5) | 14.1(2) |
| C23  | 6892.8(10) | 2741.1(5) | 5941.9(6) | 17.7(2) |
| C32  | 7593.4(10) | 3920.8(6) | 3723.1(6) | 20.1(2) |
| C2   | 4006.2(10) | 2974.3(6) | 3609.6(6) | 19.1(2) |
| C30  | 5969.9(10) | 4136.3(5) | 4343.0(6) | 17.1(2) |
| C56  | 3483.4(11) | 151.3(5)  | 7184.0(6) | 18.7(2) |
| C31  | 6699.1(10) | 4315.5(5) | 3869.7(6) | 18.9(2) |
| C44  | 7540.4(10) | 1311.0(5) | 4552.0(6) | 17.1(2) |
| C35  | 7864.9(11) | 1096.3(6) | 6756.0(6) | 20.0(2) |
| C11  | 654.7(10)  | 3836.2(6) | 5954.1(6) | 18.6(2) |
| C5   | 3677.7(11) | 1737.7(6) | 3884.8(7) | 23.6(2) |
| C45  | 8429.9(11) | 1777.8(6) | 4865.3(7) | 21.7(2) |
| C46  | 8131.0(11) | 690.4(6)  | 4455.7(7) | 23.3(2) |
| C63  | 5596.7(10) | 1923.1(6) | 7364.1(6) | 21.8(2) |
| C4   | 3710.3(11) | 1925.5(6) | 3230.8(6) | 24.6(3) |
| C38  | 8271.1(11) | -153.9(6) | 6593.2(6) | 23.6(2) |
| C37  | 9176.3(11) | 220.7(6)  | 6877.3(6) | 24.1(3) |
| C20  | 7038.0(11) | 4800.8(5) | 5829.0(6) | 20.4(2) |
| C3   | 3868.8(11) | 2544.6(6) | 3093.2(6) | 23.1(2) |
| C59  | 6897.1(11) | 1560.6(6) | 3909.0(6) | 22.4(2) |
| C66  | 5585.3(11) | 1256.5(7) | 8506.4(6) | 26.6(3) |
| C36  | 8969.0(11) | 846.0(6)  | 6960.1(7) | 24.5(3) |
| C65  | 5943.8(11) | 1860.3(7) | 8554.7(7) | 28.8(3) |
| C64  | 5952.6(11) | 2202.0(6) | 7978.7(7) | 27.2(3) |
| C12  | -308.8(11) | 3649.1(6) | 5412.8(7) | 25.0(3) |
| C53  | 2605.3(11) | 2088.3(6) | 7285.5(6) | 22.7(2) |
| C13  | 356.0(12)  | 3613.9(7) | 6630.9(7) | 27.2(3) |
| C26  | 889.7(12)  | 4527.3(6) | 5973.2(7) | 27.1(3) |
| C54  | 1366.5(12) | 2149.8(6) | 7467.3(7) | 26.5(3) |
| C21  | 6998.9(13) | 5199.7(6) | 6437.2(7) | 28.9(3) |
| C50  | 1549.3(11) | 968.3(6)  | 5681.1(7) | 25.4(3) |
| C51  | 1502.5(13) | 994.3(8)  | 4940.2(7) | 36.2(3) |

**Table S2. Fractional Atomic Coordinates ( $\times 10^4$ ) and Equivalent Isotropic Displacement Parameters ( $\text{\AA}^2 \times 10^3$ ) for 4aa.  $U_{\text{eq}}$  is defined as 1/3 of the trace of the orthogonalised  $U_{\text{IJ}}$  tensor.**

| Atom | x          | y         | z         | U(eq)   |
|------|------------|-----------|-----------|---------|
| C18  | 4130.0(17) | 3650.7(7) | 7444.0(8) | 40.5(4) |
| C17  | 5043(2)    | 3906.8(8) | 7062.2(8) | 54.6(6) |

**Table S3. Anisotropic Displacement Parameters ( $\text{\AA}^2 \times 10^3$ ) for 4aa. The Anisotropic displacement factor exponent takes the form:  $-2\pi^2[h^2a^{*2}U_{11}+2hka^*b^*U_{12}+\dots]$ .**

| Atom | $U_{11}$  | $U_{22}$  | $U_{33}$  | $U_{23}$  | $U_{13}$ | $U_{12}$  |
|------|-----------|-----------|-----------|-----------|----------|-----------|
| P15  | 17.76(14) | 12.30(13) | 15.25(13) | -1.07(10) | 4.35(10) | -1.58(10) |
| P48  | 14.90(13) | 14.42(13) | 13.30(13) | 0.61(10)  | 2.8(1)   | -1.25(10) |
| O43  | 18.2(4)   | 15.4(4)   | 14.4(4)   | -1.1(3)   | 6.2(3)   | -3.2(3)   |
| O25  | 20.4(4)   | 14.4(4)   | 23.9(4)   | -2.7(3)   | 5.8(3)   | 0.6(3)    |
| O27  | 18.1(4)   | 21.6(4)   | 16.5(4)   | 2.5(3)    | 2.8(3)   | 2.4(3)    |
| O10  | 15.4(4)   | 24.2(4)   | 16.9(4)   | 2.9(3)    | 6.3(3)   | 3.4(3)    |
| O60  | 24.4(4)   | 18.5(4)   | 13.9(4)   | -2.6(3)   | 4.3(3)   | -4.4(3)   |
| O49  | 15.7(4)   | 20.1(4)   | 19.6(4)   | -3.3(3)   | -1.1(3)  | 0.1(3)    |
| O52  | 20.0(4)   | 15.9(4)   | 18.5(4)   | -1.2(3)   | 7.0(3)   | -2.2(3)   |
| O16  | 32.0(5)   | 19.1(4)   | 14.7(4)   | -1.5(3)   | 6.2(3)   | -7.0(3)   |
| O19  | 19.4(4)   | 13.8(4)   | 23.1(4)   | -0.4(3)   | 0.9(3)   | -2.2(3)   |
| O58  | 20.1(4)   | 18.9(4)   | 20.6(4)   | 5.7(3)    | 6.1(3)   | 0.8(3)    |
| N8   | 16.4(4)   | 14.9(4)   | 16.1(4)   | 2.4(4)    | 5.9(4)   | 0.6(3)    |
| N41  | 17.1(4)   | 17.2(5)   | 12.7(4)   | -1.4(3)   | 3.6(3)   | -4.6(4)   |
| N28  | 16.0(4)   | 16.6(4)   | 16.4(4)   | -0.5(4)   | 3.3(4)   | 0.3(3)    |
| N61  | 17.9(5)   | 30.9(6)   | 13.8(4)   | 0.1(4)    | 2.6(4)   | 1.4(4)    |
| N24  | 25.3(5)   | 23.6(5)   | 27.0(6)   | 5.6(4)    | -1.0(4)  | -2.1(4)   |
| N57  | 31.4(6)   | 22.5(5)   | 26.7(6)   | 1.1(4)    | 9.9(5)   | -5.2(4)   |
| C42  | 15.8(5)   | 13.4(5)   | 14.6(5)   | 1.3(4)    | 2.8(4)   | 0.9(4)    |
| C9   | 14.5(5)   | 17.4(5)   | 13.8(5)   | -2.5(4)   | 2.2(4)   | -2.2(4)   |
| C14  | 15.0(5)   | 10.8(5)   | 14.6(5)   | -0.3(4)   | 3.4(4)   | 0.0(4)    |
| C1   | 11.8(5)   | 17.9(5)   | 16.7(5)   | -1.6(4)   | 2.9(4)   | 0.2(4)    |
| C7   | 14.2(5)   | 13.8(5)   | 14.6(5)   | 0.5(4)    | 3.8(4)   | 0.1(4)    |
| C29  | 14.7(5)   | 13.3(5)   | 14.9(5)   | -0.9(4)   | 2.4(4)   | -2.1(4)   |
| C34  | 16.8(5)   | 17.2(5)   | 12.7(5)   | 0.6(4)    | 4.1(4)   | 0.4(4)    |
| C55  | 21.4(5)   | 15.7(5)   | 13.7(5)   | 0.4(4)    | 5.4(4)   | -1.0(4)   |
| C62  | 13.0(5)   | 21.0(5)   | 14.2(5)   | -3.3(4)   | 2.2(4)   | 0.7(4)    |

**Table S3. Anisotropic Displacement Parameters ( $\text{\AA}^2 \times 10^3$ ) for 4aa. The Anisotropic displacement factor exponent takes the form:  $-2 \pi^2 [h^2 a^{*2} U_{11} + 2hka^* b^* U_{12} + \dots]$ .**

| Atom | $U_{11}$ | $U_{22}$ | $U_{33}$ | $U_{23}$ | $U_{13}$ | $U_{12}$ |
|------|----------|----------|----------|----------|----------|----------|
| C22  | 16.1(5)  | 12.3(5)  | 18.6(5)  | 1.2(4)   | 3.5(4)   | -0.9(4)  |
| C39  | 22.6(6)  | 18.2(5)  | 19.0(5)  | -1.6(4)  | 2.8(4)   | 0.5(4)   |
| C33  | 16.8(5)  | 22.1(6)  | 20.0(6)  | -0.5(4)  | 5.6(4)   | 1.8(4)   |
| C6   | 20.6(5)  | 19.0(5)  | 18.5(5)  | -1.8(4)  | 3.0(4)   | -1.1(4)  |
| C40  | 16.3(5)  | 14.8(5)  | 12.0(5)  | -0.9(4)  | 2.3(4)   | -1.0(4)  |
| C47  | 16.1(5)  | 14.3(5)  | 12.1(5)  | -0.3(4)  | 2.8(4)   | -1.0(4)  |
| C23  | 20.4(5)  | 13.4(5)  | 20.0(5)  | 3.4(4)   | 5.4(4)   | -0.8(4)  |
| C32  | 18.6(5)  | 23.8(6)  | 18.9(5)  | 1.4(4)   | 6.6(4)   | -1.9(4)  |
| C2   | 16.3(5)  | 23.3(6)  | 18.2(5)  | 0.9(4)   | 4.0(4)   | -0.7(4)  |
| C30  | 18.5(5)  | 13.3(5)  | 20.4(5)  | 0.1(4)   | 5.3(4)   | 0.4(4)   |
| C56  | 26.5(6)  | 14.9(5)  | 14.8(5)  | 0.1(4)   | 3.6(4)   | -2.1(4)  |
| C31  | 21.7(6)  | 15.5(5)  | 20.2(5)  | 2.5(4)   | 4.8(4)   | -1.8(4)  |
| C44  | 17.1(5)  | 16.9(5)  | 18.7(5)  | 0.6(4)   | 8.1(4)   | -0.5(4)  |
| C35  | 20.6(6)  | 18.6(5)  | 20.6(6)  | 1.0(4)   | 1.6(4)   | -1.6(4)  |
| C11  | 14.7(5)  | 23.0(6)  | 19.0(5)  | -2.5(4)  | 6.3(4)   | 1.5(4)   |
| C5   | 23.6(6)  | 19.4(6)  | 27.8(6)  | -5.6(5)  | 2.2(5)   | -1.8(5)  |
| C45  | 18.9(5)  | 17.8(5)  | 29.2(6)  | -0.7(5)  | 6.8(5)   | -2.2(4)  |
| C46  | 20.8(6)  | 18.5(6)  | 31.6(7)  | -3.2(5)  | 7.7(5)   | 2.0(4)   |
| C63  | 18.9(5)  | 20.8(6)  | 26.1(6)  | -2.7(5)  | 4.2(5)   | -1.1(4)  |
| C4   | 19.1(6)  | 31.5(7)  | 23.3(6)  | -11.8(5) | 2.8(5)   | 0.0(5)   |
| C38  | 28.3(6)  | 20.4(6)  | 22.5(6)  | 1.2(5)   | 4.1(5)   | 6.1(5)   |
| C37  | 20.5(6)  | 29.3(7)  | 22.5(6)  | 6.5(5)   | 2.3(5)   | 5.6(5)   |
| C20  | 19.7(5)  | 15.5(5)  | 26.4(6)  | 1.4(4)   | 4.6(5)   | -4.7(4)  |
| C3   | 18.2(5)  | 35.3(7)  | 16.0(5)  | -3.1(5)  | 3.5(4)   | 0.3(5)   |
| C59  | 24.3(6)  | 24.9(6)  | 19.1(6)  | 3.7(5)   | 7.7(5)   | -0.1(5)  |
| C66  | 19.5(6)  | 45.1(8)  | 15.1(5)  | -2.2(5)  | 0.8(4)   | 2.0(5)   |
| C36  | 19.6(6)  | 26.7(6)  | 26.4(6)  | 2.6(5)   | -1.3(5)  | -3.0(5)  |
| C65  | 18.5(6)  | 45.5(8)  | 21.8(6)  | -13.7(6) | -0.5(5)  | 1.5(5)   |
| C64  | 16.8(6)  | 26.3(6)  | 38.7(7)  | -12.4(6) | 3.5(5)   | -2.1(5)  |
| C12  | 16.6(5)  | 32.8(7)  | 25.7(6)  | -4.6(5)  | 2.9(5)   | -1.6(5)  |
| C53  | 26.0(6)  | 19.2(6)  | 23.8(6)  | -6.6(5)  | 7.0(5)   | -2.6(5)  |
| C13  | 23.4(6)  | 37.6(7)  | 22.5(6)  | 2.2(5)   | 11.2(5)  | 3.6(5)   |

**Table S3. Anisotropic Displacement Parameters ( $\text{\AA}^2 \times 10^3$ ) for 4aa. The Anisotropic displacement factor exponent takes the form:  $-2 \pi^2 [h^2 a^{*2} U_{11} + 2 h k a^* b^* U_{12} + \dots]$ .**

| Atom | $U_{11}$  | $U_{22}$ | $U_{33}$ | $U_{23}$ | $U_{13}$ | $U_{12}$  |
|------|-----------|----------|----------|----------|----------|-----------|
| C26  | 27.4(6)   | 23.8(6)  | 31.8(7)  | -6.4(5)  | 10.3(5)  | 0.3(5)    |
| C54  | 25.8(6)   | 26.0(6)  | 28.3(7)  | -4.1(5)  | 6.2(5)   | 4.4(5)    |
| C21  | 38.7(7)   | 19.7(6)  | 27.1(7)  | -2.7(5)  | -1.6(6)  | -8.1(5)   |
| C50  | 15.3(5)   | 31.2(7)  | 29.2(7)  | -5.5(5)  | 0.6(5)   | -0.5(5)   |
| C51  | 24.9(7)   | 53.6(10) | 28.2(7)  | 3.4(6)   | -5.8(5)  | 1.2(6)    |
| C18  | 63.9(11)  | 29.8(8)  | 32.1(8)  | -2.4(6)  | 25.4(7)  | 3.0(7)    |
| C17  | 104.6(16) | 40.9(9)  | 22.4(7)  | -13.3(7) | 25.3(9)  | -37.1(10) |

**Table S4. Bond Lengths for 4aa.**

| Atom | Atom | Length/ $\text{\AA}$ | Atom | Atom | Length/ $\text{\AA}$ |
|------|------|----------------------|------|------|----------------------|
| P15  | O25  | 1.4654(9)            | C29  | C30  | 1.3956(15)           |
| P15  | O16  | 1.5813(9)            | C34  | C39  | 1.3942(16)           |
| P15  | O19  | 1.5777(9)            | C34  | C40  | 1.5273(15)           |
| P15  | C14  | 1.8413(11)           | C34  | C35  | 1.3912(16)           |
| P48  | O49  | 1.5681(8)            | C55  | C47  | 1.5542(15)           |
| P48  | O52  | 1.5740(8)            | C55  | C56  | 1.4697(16)           |
| P48  | O58  | 1.4703(8)            | C62  | C47  | 1.5386(15)           |
| P48  | C47  | 1.8392(11)           | C62  | C63  | 1.3902(17)           |
| O43  | C42  | 1.3381(13)           | C22  | C23  | 1.4696(16)           |
| O43  | C44  | 1.4852(13)           | C39  | C38  | 1.3925(17)           |
| O27  | C9   | 1.2134(14)           | C33  | C32  | 1.3814(17)           |
| O10  | C9   | 1.3488(13)           | C6   | C5   | 1.3937(17)           |
| O10  | C11  | 1.4822(14)           | C40  | C47  | 1.5692(15)           |
| O60  | C42  | 1.2240(14)           | C32  | C31  | 1.3845(17)           |
| O49  | C50  | 1.4615(14)           | C2   | C3   | 1.3928(17)           |
| O52  | C53  | 1.4633(14)           | C30  | C31  | 1.3847(16)           |
| O16  | C17  | 1.4416(16)           | C44  | C45  | 1.5201(16)           |
| O19  | C20  | 1.4661(14)           | C44  | C46  | 1.5234(16)           |
| N8   | C9   | 1.3610(14)           | C44  | C59  | 1.5202(17)           |
| N8   | C7   | 1.4527(14)           | C35  | C36  | 1.3908(17)           |
| N41  | C42  | 1.3580(14)           | C11  | C12  | 1.5193(17)           |
| N41  | C40  | 1.4628(14)           | C11  | C13  | 1.5193(17)           |

**Table S4. Bond Lengths for 4aa.**

| Atom | Atom | Length/Å   | Atom | Atom | Length/Å   |
|------|------|------------|------|------|------------|
| N28  | C29  | 1.3351(14) | C11  | C26  | 1.5190(18) |
| N28  | C33  | 1.3402(15) | C5   | C4   | 1.3845(19) |
| N61  | C62  | 1.3393(15) | C63  | C64  | 1.3999(18) |
| N61  | C66  | 1.3389(16) | C4   | C3   | 1.3838(19) |
| N24  | C23  | 1.1432(16) | C38  | C37  | 1.3870(19) |
| N57  | C56  | 1.1412(16) | C37  | C36  | 1.3867(19) |
| C14  | C7   | 1.5750(15) | C20  | C21  | 1.5045(18) |
| C14  | C29  | 1.5314(15) | C66  | C65  | 1.369(2)   |
| C14  | C22  | 1.5426(15) | C65  | C64  | 1.378(2)   |
| C1   | C7   | 1.5249(15) | C53  | C54  | 1.5001(18) |
| C1   | C6   | 1.3953(16) | C50  | C51  | 1.491(2)   |
| C1   | C2   | 1.3960(16) | C18  | C17  | 1.466(2)   |

**Table S5. Bond Angles for 4aa.**

| Atom | Atom | Atom | Angle/°   | Atom | Atom | Atom | Angle/°    |
|------|------|------|-----------|------|------|------|------------|
| O25  | P15  | O16  | 115.98(5) | N61  | C62  | C63  | 122.62(11) |
| O25  | P15  | O19  | 114.06(5) | C63  | C62  | C47  | 121.58(10) |
| O25  | P15  | C14  | 114.09(5) | C23  | C22  | C14  | 116.47(9)  |
| O16  | P15  | C14  | 101.82(5) | C38  | C39  | C34  | 120.38(11) |
| O19  | P15  | O16  | 103.61(5) | N28  | C33  | C32  | 124.01(11) |
| O19  | P15  | C14  | 105.88(5) | C5   | C6   | C1   | 120.42(11) |
| O49  | P48  | O52  | 102.96(5) | N41  | C40  | C34  | 112.46(9)  |
| O49  | P48  | C47  | 102.16(5) | N41  | C40  | C47  | 109.50(9)  |
| O52  | P48  | C47  | 106.43(5) | C34  | C40  | C47  | 113.59(9)  |
| O58  | P48  | O49  | 117.02(5) | C55  | C47  | P48  | 111.76(8)  |
| O58  | P48  | O52  | 113.15(5) | C55  | C47  | C40  | 110.35(9)  |
| O58  | P48  | C47  | 113.79(5) | C62  | C47  | P48  | 105.49(7)  |
| C42  | O43  | C44  | 120.23(8) | C62  | C47  | C55  | 110.39(9)  |
| C9   | O10  | C11  | 119.29(9) | C62  | C47  | C40  | 109.45(9)  |
| C50  | O49  | P48  | 120.41(8) | C40  | C47  | P48  | 109.27(7)  |
| C53  | O52  | P48  | 122.28(7) | N24  | C23  | C22  | 174.59(12) |
| C17  | O16  | P15  | 117.88(9) | C33  | C32  | C31  | 118.21(11) |
| C20  | O19  | P15  | 121.40(7) | C3   | C2   | C1   | 120.84(11) |

**Table S5. Bond Angles for 4aa.**

| <b>Atom</b> | <b>Atom</b> | <b>Atom</b> | <b>Angle/°</b> | <b>Atom</b> | <b>Atom</b> | <b>Atom</b> | <b>Angle/°</b> |
|-------------|-------------|-------------|----------------|-------------|-------------|-------------|----------------|
| C9          | N8          | C7          | 119.69(9)      | C31         | C30         | C29         | 118.89(10)     |
| C42         | N41         | C40         | 123.28(9)      | N57         | C56         | C55         | 175.36(13)     |
| C29         | N28         | C33         | 117.35(10)     | C32         | C31         | C30         | 118.82(11)     |
| C66         | N61         | C62         | 118.10(11)     | O43         | C44         | C45         | 102.23(9)      |
| O43         | C42         | N41         | 112.23(9)      | O43         | C44         | C46         | 109.53(9)      |
| O60         | C42         | O43         | 125.45(10)     | O43         | C44         | C59         | 110.19(9)      |
| O60         | C42         | N41         | 122.30(10)     | C45         | C44         | C46         | 110.79(10)     |
| O27         | C9          | O10         | 125.80(10)     | C45         | C44         | C59         | 111.03(10)     |
| O27         | C9          | N8          | 124.18(10)     | C59         | C44         | C46         | 112.58(10)     |
| O10         | C9          | N8          | 110.02(10)     | C36         | C35         | C34         | 120.65(11)     |
| C7          | C14         | P15         | 107.47(7)      | O10         | C11         | C12         | 109.44(9)      |
| C29         | C14         | P15         | 107.70(7)      | O10         | C11         | C13         | 102.49(9)      |
| C29         | C14         | C7          | 108.25(8)      | O10         | C11         | C26         | 110.73(9)      |
| C29         | C14         | C22         | 111.33(9)      | C12         | C11         | C13         | 110.41(10)     |
| C22         | C14         | P15         | 111.79(7)      | C26         | C11         | C12         | 113.11(11)     |
| C22         | C14         | C7          | 110.14(8)      | C26         | C11         | C13         | 110.14(10)     |
| C6          | C1          | C7          | 121.90(10)     | C4          | C5          | C6          | 120.57(12)     |
| C6          | C1          | C2          | 118.45(11)     | C62         | C63         | C64         | 117.93(12)     |
| C2          | C1          | C7          | 119.62(10)     | C3          | C4          | C5          | 119.50(11)     |
| N8          | C7          | C14         | 111.29(9)      | C37         | C38         | C39         | 120.39(12)     |
| N8          | C7          | C1          | 113.20(9)      | C36         | C37         | C38         | 119.44(11)     |
| C1          | C7          | C14         | 113.06(9)      | O19         | C20         | C21         | 109.78(10)     |
| N28         | C29         | C14         | 116.73(9)      | C4          | C3          | C2          | 120.20(12)     |
| N28         | C29         | C30         | 122.71(10)     | N61         | C66         | C65         | 123.40(13)     |
| C30         | C29         | C14         | 120.56(10)     | C37         | C36         | C35         | 120.28(12)     |
| C39         | C34         | C40         | 121.54(10)     | C66         | C65         | C64         | 118.72(12)     |
| C35         | C34         | C39         | 118.85(11)     | C65         | C64         | C63         | 119.22(12)     |
| C35         | C34         | C40         | 119.53(10)     | O52         | C53         | C54         | 108.03(10)     |
| C56         | C55         | C47         | 116.45(9)      | O49         | C50         | C51         | 108.63(10)     |
| N61         | C62         | C47         | 115.75(10)     | O16         | C17         | C18         | 110.80(13)     |

**Table S6. Torsion Angles for 4aa.**

| <b>A</b> | <b>B</b> | <b>C</b> | <b>D</b> | <b>Angle/°</b> | <b>A</b> | <b>B</b> | <b>C</b> | <b>D</b> | <b>Angle/°</b> |
|----------|----------|----------|----------|----------------|----------|----------|----------|----------|----------------|
| P15      | O16      | C17      | C18      | 143.06(13)     | C7       | N8       | C9       | O10      | -169.06(9)     |
| P15      | O19      | C20      | C21      | 93.89(11)      | C7       | C14      | C29      | N28      | -116.89(10)    |
| P15      | C14      | C7       | N8       | -52.70(10)     | C7       | C14      | C29      | C30      | 62.81(13)      |
| P15      | C14      | C7       | C1       | 178.58(7)      | C7       | C14      | C22      | C23      | -168.67(9)     |
| P15      | C14      | C29      | N28      | 127.19(9)      | C7       | C1       | C6       | C5       | 178.48(11)     |
| P15      | C14      | C29      | C30      | -53.10(12)     | C7       | C1       | C2       | C3       | -177.51(10)    |
| P15      | C14      | C22      | C23      | -49.27(12)     | C29      | N28      | C33      | C32      | 0.01(17)       |
| P48      | O49      | C50      | C51      | 112.56(11)     | C29      | C14      | C7       | N8       | -168.77(9)     |
| P48      | O52      | C53      | C54      | 142.87(9)      | C29      | C14      | C7       | C1       | 62.51(11)      |
| O25      | P15      | O16      | C17      | -57.66(14)     | C29      | C14      | C22      | C23      | 71.24(12)      |
| O25      | P15      | O19      | C20      | -9.97(10)      | C29      | C30      | C31      | C32      | -0.01(17)      |
| O25      | P15      | C14      | C7       | -34.95(8)      | C34      | C39      | C38      | C37      | -0.58(18)      |
| O25      | P15      | C14      | C29      | 81.48(8)       | C34      | C40      | C47      | P48      | 176.25(7)      |
| O25      | P15      | C14      | C22      | -155.92(7)     | C34      | C40      | C47      | C55      | -60.48(12)     |
| O49      | P48      | O52      | C53      | -146.48(9)     | C34      | C40      | C47      | C62      | 61.20(12)      |
| O49      | P48      | C47      | C55      | -33.59(8)      | C34      | C35      | C36      | C37      | -0.01(19)      |
| O49      | P48      | C47      | C62      | -153.59(7)     | C62      | N61      | C66      | C65      | 0.58(18)       |
| O49      | P48      | C47      | C40      | 88.84(8)       | C62      | C63      | C64      | C65      | -0.29(18)      |
| O52      | P48      | O49      | C50      | 59.96(9)       | C22      | C14      | C7       | N8       | 69.30(11)      |
| O52      | P48      | C47      | C55      | 74.03(8)       | C22      | C14      | C7       | C1       | -59.42(12)     |
| O52      | P48      | C47      | C62      | -45.96(8)      | C22      | C14      | C29      | N28      | 4.31(13)       |
| O52      | P48      | C47      | C40      | -163.54(7)     | C22      | C14      | C29      | C30      | -175.99(10)    |
| O16      | P15      | O19      | C20      | -136.96(9)     | C39      | C34      | C40      | N41      | -39.59(14)     |
| O16      | P15      | C14      | C7       | 90.77(8)       | C39      | C34      | C40      | C47      | 85.49(13)      |
| O16      | P15      | C14      | C29      | -152.80(7)     | C39      | C34      | C35      | C36      | 0.14(17)       |
| O16      | P15      | C14      | C22      | -30.20(8)      | C39      | C38      | C37      | C36      | 0.70(19)       |
| O19      | P15      | O16      | C17      | 68.11(13)      | C33      | N28      | C29      | C14      | 179.22(10)     |
| O19      | P15      | C14      | C7       | -161.21(7)     | C33      | N28      | C29      | C30      | -0.47(16)      |
| O19      | P15      | C14      | C29      | -44.78(8)      | C33      | C32      | C31      | C30      | -0.42(18)      |
| O19      | P15      | C14      | C22      | 77.82(8)       | C6       | C1       | C7       | N8       | -41.99(14)     |
| O58      | P48      | O49      | C50      | -64.81(10)     | C6       | C1       | C7       | C14      | 85.74(12)      |
| O58      | P48      | O52      | C53      | -19.22(10)     | C6       | C1       | C2       | C3       | 0.41(17)       |
| O58      | P48      | C47      | C55      | -160.66(7)     | C6       | C5       | C4       | C3       | 0.38(19)       |

**Table S6. Torsion Angles for 4aa.**

| A   | B   | C   | D   | Angle/°     | A   | B   | C   | D   | Angle/°     |
|-----|-----|-----|-----|-------------|-----|-----|-----|-----|-------------|
| O58 | P48 | C47 | C62 | 79.34(8)    | C40 | N41 | C42 | O43 | -15.41(15)  |
| O58 | P48 | C47 | C40 | -38.23(9)   | C40 | N41 | C42 | O60 | 165.85(10)  |
| N41 | C40 | C47 | P48 | -57.10(10)  | C40 | C34 | C39 | C38 | 176.83(11)  |
| N41 | C40 | C47 | C55 | 66.17(11)   | C40 | C34 | C35 | C36 | -176.61(11) |
| N41 | C40 | C47 | C62 | -172.15(9)  | C47 | P48 | O49 | C50 | 170.23(9)   |
| N28 | C29 | C30 | C31 | 0.48(17)    | C47 | P48 | O52 | C53 | 106.47(9)   |
| N28 | C33 | C32 | C31 | 0.44(19)    | C47 | C62 | C63 | C64 | 178.28(10)  |
| N61 | C62 | C47 | P48 | 115.55(9)   | C2  | C1  | C7  | N8  | 135.86(10)  |
| N61 | C62 | C47 | C55 | -5.34(13)   | C2  | C1  | C7  | C14 | -96.41(12)  |
| N61 | C62 | C47 | C40 | -127.00(10) | C2  | C1  | C6  | C5  | 0.61(17)    |
| N61 | C62 | C63 | C64 | 0.78(17)    | C56 | C55 | C47 | P48 | -43.27(12)  |
| N61 | C66 | C65 | C64 | -0.1(2)     | C56 | C55 | C47 | C62 | 73.81(12)   |
| C42 | O43 | C44 | C45 | -173.33(9)  | C56 | C55 | C47 | C40 | -165.07(9)  |
| C42 | O43 | C44 | C46 | -55.80(13)  | C44 | O43 | C42 | O60 | -10.70(16)  |
| C42 | O43 | C44 | C59 | 68.57(12)   | C44 | O43 | C42 | N41 | 170.61(9)   |
| C42 | N41 | C40 | C34 | -61.76(14)  | C35 | C34 | C39 | C38 | 0.16(17)    |
| C42 | N41 | C40 | C47 | 170.95(10)  | C35 | C34 | C40 | N41 | 137.06(11)  |
| C9  | O10 | C11 | C12 | 64.34(13)   | C35 | C34 | C40 | C47 | -97.85(12)  |
| C9  | O10 | C11 | C13 | -178.47(10) | C11 | O10 | C9  | O27 | 4.42(17)    |
| C9  | O10 | C11 | C26 | -61.02(13)  | C11 | O10 | C9  | N8  | -175.33(9)  |
| C9  | N8  | C7  | C14 | 123.50(10)  | C5  | C4  | C3  | C2  | 0.64(18)    |
| C9  | N8  | C7  | C1  | -107.86(11) | C63 | C62 | C47 | P48 | -62.11(12)  |
| C14 | P15 | O16 | C17 | 177.88(13)  | C63 | C62 | C47 | C55 | 176.99(10)  |
| C14 | P15 | O19 | C20 | 116.30(9)   | C63 | C62 | C47 | C40 | 55.34(13)   |
| C14 | C29 | C30 | C31 | -179.21(10) | C38 | C37 | C36 | C35 | -0.41(19)   |
| C1  | C6  | C5  | C4  | -1.01(19)   | C66 | N61 | C62 | C47 | -178.55(10) |
| C1  | C2  | C3  | C4  | -1.04(18)   | C66 | N61 | C62 | C63 | -0.91(17)   |
| C7  | N8  | C9  | O27 | 11.19(17)   | C66 | C65 | C64 | C63 | -0.01(19)   |

**Table S7. Hydrogen Atom Coordinates ( $\text{\AA} \times 10^4$ ) and Isotropic Displacement Parameters ( $\text{\AA}^2 \times 10^3$ ) for 4aa.**

| Atom | <i>x</i> | <i>y</i> | <i>z</i> | U(eq) |
|------|----------|----------|----------|-------|
| H7   | 3869.11  | 3680.95  | 4600.2   | 17    |
| H55A | 4500.47  | 48.85    | 6433.77  | 20    |



**Table S7. Hydrogen Atom Coordinates ( $\text{\AA} \times 10^4$ ) and Isotropic Displacement Parameters ( $\text{\AA}^2 \times 10^3$ ) for 4aa.**

| Atom | <i>x</i> | <i>y</i> | <i>z</i> | U(eq) |
|------|----------|----------|----------|-------|
| H55B | 5240.66  | 108.62   | 7147.4   | 20    |
| H22A | 5162.5   | 2553.79  | 5734.52  | 19    |
| H22B | 5910.42  | 2432.28  | 5121.47  | 19    |
| H39  | 6553.77  | -163.35  | 6187.74  | 24    |
| H33  | 8339.14  | 3097.25  | 3961.62  | 23    |
| H6   | 3759.3   | 2033.03  | 4848.81  | 23    |
| H40  | 5922.19  | 1468.04  | 6147.45  | 17    |
| H32  | 8105.5   | 4028.85  | 3398.76  | 24    |
| H2   | 4127.68  | 3397.27  | 3510.75  | 23    |
| H30  | 5349.53  | 4398.31  | 4453.06  | 21    |
| H31  | 6587.78  | 4702.42  | 3649.47  | 23    |
| H35  | 7731.25  | 1525.22  | 6814.79  | 24    |
| H5   | 3573.78  | 1312.65  | 3981.23  | 28    |
| H45A | 8032.76  | 2173.1   | 4922.29  | 33    |
| H45B | 9058.82  | 1835.84  | 4574.63  | 33    |
| H45C | 8771.45  | 1625.26  | 5300.86  | 33    |
| H46A | 8489.49  | 537.12   | 4887.38  | 35    |
| H46B | 8744.08  | 741.21   | 4153.39  | 35    |
| H46C | 7539.32  | 393.79   | 4264.23  | 35    |
| H63  | 5590.39  | 2148.06  | 6959.3   | 26    |
| H4   | 3624.56  | 1631.54  | 2879.23  | 29    |
| H38  | 8405.5   | -583.41  | 6539.81  | 28    |
| H37  | 9931.91  | 50.31    | 7014.14  | 29    |
| H20A | 6508.31  | 4974.19  | 5454.25  | 24    |
| H20B | 7851.05  | 4793.56  | 5696.74  | 24    |
| H3   | 3883.89  | 2676.93  | 2645.06  | 28    |
| H59A | 6335.2   | 1250.51  | 3714.98  | 34    |
| H59B | 7470.89  | 1653.98  | 3593.32  | 34    |
| H59C | 6470.63  | 1938.37  | 4004.31  | 34    |
| H66  | 5582.84  | 1023.23  | 8905.3   | 32    |
| H36  | 9583.71  | 1104.63  | 7157.07  | 29    |
| H65  | 6181.79  | 2040.22  | 8977.14  | 35    |
| H64  | 6197.25  | 2621.95  | 7998.4   | 33    |

**Table S7. Hydrogen Atom Coordinates ( $\text{\AA} \times 10^4$ ) and Isotropic Displacement Parameters ( $\text{\AA}^2 \times 10^3$ ) for 4aa.**

| <b>Atom</b> | <b><i>x</i></b> | <b><i>y</i></b> | <b><i>z</i></b> | <b>U(eq)</b> |
|-------------|-----------------|-----------------|-----------------|--------------|
| H12A        | -130.12         | 3818.57         | 4984.11         | 37           |
| H12B        | -1069.78        | 3810.62         | 5521.06         | 37           |
| H12C        | -347.85         | 3197.33         | 5383.95         | 37           |
| H53A        | 2774.74         | 2420.02         | 6971.16         | 27           |
| H53B        | 3175.19         | 2123.77         | 7689.52         | 27           |
| H13A        | 219.34          | 3166.75         | 6615.24         | 41           |
| H13B        | -358.04         | 3824.25         | 6745            | 41           |
| H13C        | 1014.15         | 3707.29         | 6969.14         | 41           |
| H26A        | 1575.36         | 4614.93         | 6294.97         | 41           |
| H26B        | 196.56          | 4743.97         | 6107.17         | 41           |
| H26C        | 1048.63         | 4668.74         | 5529.8          | 41           |
| H54A        | 811.38          | 2132.26         | 7062.2          | 40           |
| H54B        | 1280.45         | 2546.06         | 7692.53         | 40           |
| H54C        | 1198.45         | 1811.39         | 7766.13         | 40           |
| H21A        | 7289.31         | 5614.29         | 6346.33         | 43           |
| H21B        | 7498.11         | 5017.21         | 6811.94         | 43           |
| H21C        | 6183.65         | 5227.53         | 6549.36         | 43           |
| H50A        | 1256.78         | 1361.5          | 5853.45         | 30           |
| H50B        | 1041.84         | 628.58          | 5815.24         | 30           |
| H51A        | 676.92          | 989.54          | 4745.4          | 54           |
| H51B        | 1916.27         | 635.89          | 4779.66         | 54           |
| H51C        | 1883.4          | 1374.69         | 4808.38         | 54           |
| H18A        | 3357.35         | 3686.48         | 7182.64         | 61           |
| H18B        | 4120.89         | 3879.93         | 7862.45         | 61           |
| H18C        | 4301.41         | 3214.46         | 7542.21         | 61           |
| H17A        | 4872.4          | 4348.25         | 6965.4          | 66           |
| H17B        | 5820.58         | 3879.87         | 7330.39         | 66           |
| H41         | 4851(14)        | 458(8)          | 5543(8)         | 26(4)        |
| H8          | 3311(15)        | 2899(8)         | 5602(9)         | 33(4)        |
